# Supplementary material for: Google Trends-based non-English language query data and epidemic diseases: a cross-sectional study of the popular search behaviour in Taiwan
Source: PubMed Central journal article supplement — BMJ Open. 2020 Jul 5;10(7):e034156. doi: 10.1136/bmjopen-2019-034156 (PMC7337886; doi:10.1136/bmjopen-2019-034156), 2020-07-05
Supplement: bmjopen-2019-034156.draft_revisions.pdf [file bmjopen-2019-034156.draft_revisions.pdf]

# BMJ Open

BMJ Open is committed to open peer review. As part of this commitment we make the peer review history of every article we publish publicly available.

When an article is published we post the peer reviewers' comments and the authors' responses online. We also post the versions of the paper that were used during peer review. These are the versions that the peer review comments apply to.

The versions of the paper that follow are the versions that were submitted during the peer review process. They are not the versions of record or the final published versions. They should not be cited or distributed as the published version of this manuscript.

BMJ Open is an open access journal and the full, final, typeset and author-corrected version of record of the manuscript is available on our site with no access controls, subscription charges or pay-per-view fees (<http://bmjopen.bmj.com>).

If you have any questions on BMJ Open's open peer review process please email [info.bmjopen@bmj.com](mailto:info.bmjopen@bmj.com)

# BMJ Open

## Using Non-English Language Google Trends to Assess Epidemic Diseases and Public Opinion through Popular Search Behavior

|                               |                                                                                                                                                                                                                                                                                                                                                                                                                                                                                                                                                                                                                                                                                                                                                                                                                                                                                                                                                                                                                                                                                                                                                                                                                                                                                                                                                                                   |
|-------------------------------|-----------------------------------------------------------------------------------------------------------------------------------------------------------------------------------------------------------------------------------------------------------------------------------------------------------------------------------------------------------------------------------------------------------------------------------------------------------------------------------------------------------------------------------------------------------------------------------------------------------------------------------------------------------------------------------------------------------------------------------------------------------------------------------------------------------------------------------------------------------------------------------------------------------------------------------------------------------------------------------------------------------------------------------------------------------------------------------------------------------------------------------------------------------------------------------------------------------------------------------------------------------------------------------------------------------------------------------------------------------------------------------|
| Journal:                      | <i>BMJ Open</i>                                                                                                                                                                                                                                                                                                                                                                                                                                                                                                                                                                                                                                                                                                                                                                                                                                                                                                                                                                                                                                                                                                                                                                                                                                                                                                                                                                   |
| Manuscript ID                 | bmjopen-2019-034156                                                                                                                                                                                                                                                                                                                                                                                                                                                                                                                                                                                                                                                                                                                                                                                                                                                                                                                                                                                                                                                                                                                                                                                                                                                                                                                                                               |
| Article Type:                 | Original research                                                                                                                                                                                                                                                                                                                                                                                                                                                                                                                                                                                                                                                                                                                                                                                                                                                                                                                                                                                                                                                                                                                                                                                                                                                                                                                                                                 |
| Date Submitted by the Author: | 13-Sep-2019                                                                                                                                                                                                                                                                                                                                                                                                                                                                                                                                                                                                                                                                                                                                                                                                                                                                                                                                                                                                                                                                                                                                                                                                                                                                                                                                                                       |
| Complete List of Authors:     | <p>Chang, Yu-Wei; Graduate Institute of Medicine, College of Medicine, Kaohsiung Medical University; Department of Laboratory, Taitung Hospital, Ministry of Health and Welfare</p> <p>Chiang, Wei-Lun; Pan Media Company; OmnInsight Company</p> <p>Wang, Wen-Hung; School of Medicine, Graduate Institute of Medicine, Sepsis Research Center, Center of Dengue Fever Control and Research, Kaohsiung Medical University; Department of Internal Medicine, Kaohsiung Medical University Hospital</p> <p>Lin, Chun-Yu; Graduate Institute of Medicine, College of Medicine, Kaohsiung Medical University; School of Medicine, Graduate Institute of Medicine, Sepsis Research Center, Center of Dengue Fever Control and Research, Kaohsiung Medical University</p> <p>Hung, Ling-Chien; School of Medicine, Graduate Institute of Medicine, Sepsis Research Center, Center of Dengue Fever Control and Research, Kaohsiung Medical University; Department of Internal Medicine, Kaohsiung Medical University Hospital</p> <p>Tsai, Yi-Chang; Department of Laboratory, Chang-Hua Hospital, Ministry of Health and Welfare</p> <p>Chen, Y.-H. ; School of Medicine, Graduate Institute of Medicine, Sepsis Research Center, Center of Dengue Fever Control and Research, Kaohsiung Medical University; Department of Internal Medicine, Kaohsiung Municipal Ta-Tung Hospital</p> |
| Keywords:                     | Health informatics < BIOTECHNOLOGY & BIOINFORMATICS, EPIDEMIOLOGY, PUBLIC HEALTH                                                                                                                                                                                                                                                                                                                                                                                                                                                                                                                                                                                                                                                                                                                                                                                                                                                                                                                                                                                                                                                                                                                                                                                                                                                                                                  |
|                               |                                                                                                                                                                                                                                                                                                                                                                                                                                                                                                                                                                                                                                                                                                                                                                                                                                                                                                                                                                                                                                                                                                                                                                                                                                                                                                                                                                                   |

SCHOLARONE™  
Manuscripts

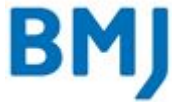

I, the Submitting Author has the right to grant and does grant on behalf of all authors of the Work (as defined in the below author licence), an exclusive licence and/or a non-exclusive licence for contributions from authors who are: i) UK Crown employees; ii) where BMJ has agreed a CC-BY licence shall apply, and/or iii) in accordance with the terms applicable for US Federal Government officers or employees acting as part of their official duties; on a worldwide, perpetual, irrevocable, royalty-free basis to BMJ Publishing Group Ltd ("BMJ") its licensees and where the relevant Journal is co-owned by BMJ to the co-owners of the Journal, to publish the Work in this journal and any other BMJ products and to exploit all rights, as set out in our [licence](#).

The Submitting Author accepts and understands that any supply made under these terms is made by BMJ to the Submitting Author unless you are acting as an employee on behalf of your employer or a postgraduate student of an affiliated institution which is paying any applicable article publishing charge ("APC") for Open Access articles. Where the Submitting Author wishes to make the Work available on an Open Access basis (and intends to pay the relevant APC), the terms of reuse of such Open Access shall be governed by a Creative Commons licence – details of these licences and which [Creative Commons](#) licence will apply to this Work are set out in our licence referred to above.

Other than as permitted in any relevant BMJ Author's Self Archiving Policies, I confirm this Work has not been accepted for publication elsewhere, is not being considered for publication elsewhere and does not duplicate material already published. I confirm all authors consent to publication of this Work and authorise the granting of this licence.

**Title page**

**Title:** Using Non-English Language Google Trends to Assess Epidemic Diseases and Public Opinion through Popular Search Behavior

**Authors:** Yu-Wei Chang<sup>1,2\*</sup>; Wei-Lun Chiang<sup>3,4\*</sup>; Wen-Hung Wang<sup>5,6</sup>; Chun-Yu Lin<sup>1,5,6</sup>; Ling-Chien Hung<sup>5,6</sup>; Yi-Chang Tsai<sup>7</sup>; Yen-Hsu Chen<sup>6,8,9</sup>, MD, PhD, MBA

**Affiliation:**

<sup>1</sup>Graduate Institute of Medicine, College of Medicine, Kaohsiung Medical University, Kaohsiung, Taiwan

<sup>2</sup>Department of Laboratory, Taitung Hospital, Ministry of Health and Welfare, Taitung, Taiwan

<sup>3</sup>Pan Media Company, Taipei, Taiwan

<sup>4</sup>OmnInsight Company, Taipei, Taiwan

<sup>5</sup>Department of Internal Medicine, Kaohsiung Medical University Hospital, Kaohsiung, Taiwan

<sup>6</sup>School of Medicine, Graduate Institute of Medicine, Sepsis Research Center, Center of Dengue Fever Control and Research, Kaohsiung Medical University, Kaohsiung, Taiwan

<sup>7</sup>Department of Laboratory, Chang-Hua Hospital, Ministry of Health and Welfare, Chang Hua, Taiwan

<sup>8</sup>Department of Internal Medicine, Kaohsiung Municipal Ta-Tung Hospital, Kaohsiung, Taiwan

<sup>9</sup>Department of Biological Science and Technology, College of Biological Science and Technology, National Chiao Tung University, HsinChu, Taiwan

\*these authors contributed equally

**Corresponding author:**

Yen-Hsu Chen, MD, PhD, MBA

Department of Internal Medicine

Kaohsiung Municipal Ta-Tung Hospital No.68, Jhonghua 3rd Rd, Cianjin District Kaohsiung, 80145, Taiwan

Phone: 886 7 291 1101

Fax: 886 7 291 1590

Email: infchen@gmail.com

## Abstract

**Objective:** This study aims to develop a suitable surveillance system for monitoring epidemic outbreak and observing related public opinion in the non-English language countries. We further evaluated whether social media reflected social uneasiness and fear during epidemic outbreaks and natural catastrophes.

**Design:** Prospective, observational study.

**Setting:** The freely available epidemic data in Taiwan

**Main outcome measure:** The weekly epidemic incidence data obtained from Taiwan Center for Disease Control (TCDC) and the web search query data obtained from Google Trends between October 4, 2015, and April 2, 2016. To validate whether the non-English query keywords were the excellent surveillance tools, we estimated the correlation between the web query data and epidemic incidence in Taiwan.

**Results:** Based on our approach, we found the keywords, “感冒(common cold), 發燒(fever), and 咳嗽(cough)”, revealed good to excellent correlation between the Google Trends query data and influenza incidence ( $r = 0.898, P < .001$ ;  $r = 0.773, P < .001$ ;  $r = 0.796, P < .001$ ). Those also displayed a high correlation with the influenza-like illness emergency ( $r = 0.900, P < .001$ ;  $r = 0.802, P < .001$ ;  $r = 0.886, P < .001$ ) and outpatient visits ( $r = 0.889, P < .001$ ;  $r = 0.791, P < .001$ ;  $r = 0.870, P < .001$ ). We further found the query “腸病毒 (enteroviruses)” showed excellent correlation with enterovirus infected patients in the emergency department ( $r = 0.914, P < .001$ ).

**Conclusions:** These results suggested that Google Trends can serve as a good surveillance tool for epidemic outbreaks even in non-English language countries. The online search activity indicated people’s concerns for epidemic diseases even they do not visit hospitals. It prompted us to develop the effectiveness of epidemic monitoring in web social media, which reflected the infectious trend more timeliness than traditional reporting system.

**Keywords:** Google Trends; epidemic surveillance tool; non-English language

### Strengths and Limitations:

1. This is the potential study to access the association between non-English queries and the incidence of the epidemic outbreaks in the non-English language countries.
2. In public opinion observation, we found that internet search activities of appropriate non-English language (Chinese) keywords not only reflect the epidemic disease surveillance but what people concern in the infectious crisis.

3. The forecasting effects of web queries data in the other seasonal infectious diseases were not clear so far, due to these findings mainly focused on the specific epidemic diseases, such as influenza-like illness and EN71 infection.
4. Apart from Google trends, we need to combine more social media to comprehensively analysis the epidemic information through web-related behaviors.

## Introduction

Timeliness and public opinion are critical in acute epidemic disease control.<sup>1 2</sup> Effective disease surveillance systems and public relations crisis management support public healthcare action and disseminate accurate health information messages.<sup>3-6</sup> Thus, to develop an early warning system for epidemics is the real critical work. However, the traditional epidemic surveillance systems in current depended on the information derived from laboratory test results, outpatient reports, and mortality statistics. Those of laboratory results for a real-time response are limited because of a several-week lag in reporting.<sup>1</sup> The previous studies highlighted the prolonged delays in reporting an epidemic situation hinder the prevention of the spread of infectious diseases.<sup>1 7 8</sup> Furthermore, inadequate timeliness induces negative public opinion and causes a public relations crisis for the government.

With the development of the Internet and social media, scientists have used data such as Google Trends, health-related tweets, and self-established cloud platforms to assess the activity of acute epidemic diseases and improve individual health care.<sup>9-13</sup> Estimating the levels of infectious diseases by analyzing Internet activity provides highly sensitive assessments compared with those calculated through hospital reports because online activity indicates people's concerns for epidemic diseases even when they do not visit hospitals.<sup>14-16</sup> Moreover, tracking diseases through Internet activity requires lesser effort than that necessary for evaluating laboratory test results and hospital reports.

Analysis based on the relative intensity of Google keywords research relative intensity provides near real-time data.<sup>17</sup> Internet data analysis has advantages over surveys, providing options to narrow data according to desired countries, times, and languages. However, the studies of establishing a surveillance model to estimate epidemic diseases in non-English language countries are still controversial.<sup>18 19</sup> There are few effective surveillance systems for assessing infectious diseases on the basis of Internet activity, despite the high availability and use of the Internet and social media in Taiwan. Therefore, the objectives of this study are to assess whether non-English language (Chinese) Google Trends

1  
2  
3  
4 can be used as an epidemic surveillance system and further application in  
5 monitoring public opinion and managing public relations.  
6

## 7 **Methods**

### 8 **Setting and study period**

9  
10 National surveillance data of influenza (from October 4, 2015, to April 2, 2016)  
11 and enterovirus (from January 1, 2012, to December 29, 2012) were obtained  
12 from TCDC, which regularly collects and manages the epidemiological data  
13 received from the whole cities and counties in Taiwan.  
14  
15  
16

### 17 **Data Sources**

#### 18 ***Epidemiological Surveillance Data***

19  
20 This survey provided by TCDC is responsible for the national emerging disease  
21 surveillance and disease prevention.<sup>20</sup> For the influenza analysis, the epidemic  
22 data was collected and categorized to the weekly number of positive influenza  
23 tests, the ratio of emergency department patients with influenza-like illness (ILI),  
24 the ratio of outpatient department patients with ILI, and weekly deaths from  
25 pneumonia and ILI. For the enterovirus analysis, the ratio of emergency  
26 department patients with enteroviruses infection was obtained. Ethically, the  
27 open data obtained from TCDC was anonymous and publicly available.  
28  
29  
30  
31  
32  
33

#### 34 ***Query Data from Google Trends***

35  
36 The query data was obtained from Google Trends website, which was provided by  
37 Google Inc.<sup>21</sup> As previously described, the query trends obtained from Google  
38 Trends indicates the normalized results (0-100), which is compared to the  
39 maximal value for the particular queries during the search interval.<sup>3</sup> Based on our  
40 approach, 10 non-English influenza and enterovirus related search terms were  
41 enrolled in the analysis, which was cataloged in Table 1, including the disease  
42 names, symptoms, medical equipment, and drugs. For example, disease names  
43 cataloged as query terms such as "common cold", "influenza" and "enterovirus".  
44 Table 1 listed the epidemic related categories and query terms; Multimedia  
45 Appendix 1 listed these terms represented in Chinese and described in English  
46 simultaneously. Other criteria involved in the queries analysis are following by  
47 Chinese (language), (search interval), and Taiwan (location). By setting the  
48 criteria as followed by location to "Taiwan", the search time interval to "October  
49 2015 to March 2016 for influenza; January 2012 to December 2012 for  
50 enterovirus", and the language to "Chinese", we downloaded query information of  
51 Google trends via all the search terms in Traditional Chinese.  
52  
53  
54  
55  
56  
57  
58  
59  
60

## Patient and Public Involvement

No patient involved in the study. The epidemic information presented in the study was freely available from TCDC, which has been removed any possible identifying features relating to individuals.

## Statistical Analysis

Initial analysis was conducted by graphically evaluating the data trends according to time. Furthermore, a cross-correlation analysis using SAS 9.3 (SAS Institute, Cary, NC, USA) was conducted to examine the correlation of Google Trends with influenza-related data. One-week forward forecasting analyses were introduced to assess these relationships temporally (i.e., cross-correlated analysis through Google-based research of relative intensity for N weeks and of influenza-related data for N+1 weeks). Correlation coefficients of > 0.8 were defined as indicating excellent correlation, 0.6–0.8 as good correlation, 0.4–0.6 as moderate correlation, and < 0.4 as poor or no correlation.<sup>22-24</sup>

## Results

### Influenza-like Illness (ILI) Surveillance Study

TCDC routinely provides open government data for epidemiologic surveillance, which is available for not only infectious disease control but preventive healthcare study.<sup>20</sup> First, we aimed to evaluate the effectiveness in influenza surveillance of anonymous logs derived from Web search engine queries. Based on the proposal, we collected national influenza surveillance data from October 4, 2015 to April 2, 2016. The total of 8 queries related to influenza (Table 1) were chosen to estimate the correlation between query data from Google Trends and the influenza-related data obtained from TCDC, including weekly number of patients with influenza, ratio of emergency department patients with ILI, ratio of outpatient department patients with ILI, and weekly deaths from pneumonia and ILI. As shown in Figure 1, the peak indicating the patients with influenza was observed in February 2016 (weeks 18–21), with a simultaneously elevated level for the other three influenza-related data (Figures 2-4). Of note, Figures 1-4 graphically represent the temporal relationship and illustrate the evident increase in the four influenza-related data with a simultaneous increase in the relative intensities of the Google keywords. After February 2016, the four influenza-related data and all keywords decreased simultaneously from March 2016 (after week 22). Analytically, Table 2 lists the correlation coefficients between Google keywords research relative intensities and influenza-related data for “no forward” and “one week forward”. Those indicate the non-English language keywords, such as 感冒 (common cold,  $r = 0.898$ ,  $P < .001$ ), 發燒 (fever,  $r = 0.773$ ,  $P < .001$ ), and 咳嗽 (cough,  $r = 0.796$ ,  $P < .001$ ) had



1  
2  
3  
4 a high correlation with the weekly number of positive influenza tests. When 1-  
5 week forward was introduced to the forecasting analysis, the similar results can  
6 be seen in these keywords, which presented the good to excellent correlation.  
7 Interestingly, these certain keywords research intensities also highly correlated  
8 with the ILI related medical requests, including the ratio of emergency (or  
9 outpatient) department patients with ILI and weekly deaths due to pneumonia  
10 and ILI. For all correlations, the keyword “感冒 (common cold)” showed the  
11 highest correlation with all influenza-related data for “on forward” ( $r = .898, P$   
12  $< 0.001$ ) and “one-week forward” ( $r = .900, P < 0.001$ ) analysis and indicated  
13 excellent correlation. However, the symptom keywords research relative  
14 intensities, such as 流鼻水 (runny nose,  $r = 0.076 \sim 0.263$ ) and 喉嚨痛 (sore throat,  
15  $r = 0.639 \sim 0.783$ ) showed a weaker correlation with the influenza-related data  
16 (Table 2), thus indicating that suitable non-English language (Chinese) keywords  
17 reflect the level of influenza. Taken together, these results showed that the  
18 suitable non-English language (Chinese, eg, 感冒, 發燒, and 咳嗽) keywords  
19 research relative intensities reflected the real-time infectious condition of  
20 influenza, including the positive rate and the overall medical requests for the ILI  
21 syndrome.  
22  
23  
24  
25  
26  
27  
28  
29  
30

### 31 EN71 Infection Surveillance Study

32 Enterovirus 71 (EN71) was first identified in California, USA, in 1969. From then  
33 on, EN71 has been detected worldwide.<sup>25</sup> Especially in Taiwan, EN71 repeatedly  
34 caused life-threatening outbreaks of hand-foot-mouth disease with the  
35 neurological disorder in childhood.<sup>26 27</sup> To our approach, we then estimated  
36 whether the web query data in Google Trends can serve as a surveillance tool of  
37 EN71 infection in Taiwan. As can be seen in figure 5 and table 3, the query “腸病  
38 毒 (Enterovirus)” revealed excellence correlation ( $r = 0.91, P < .001$ ) with the ratio  
39 of emergency department patients with EN71 infection. However, the following  
40 by search terms, such as 水泡 (blister) or 發燒 (fever), showed poor to moderate  
41 correlation. ( $r = 0.478, P < .001$ ;  $r = 0.359, P < .001$ , respectively)  
42  
43  
44  
45  
46  
47  
48

### 49 Public Opinion Estimation

50 Public opinion analysis is critical for acute epidemic disease control. Moreover,  
51 public opinion regarding an epidemic disease is influenced by several external  
52 factors, which can be classified into various groups such as culture, media, opinion  
53 leaders, and major events.<sup>28</sup> The certain keywords include standard names of  
54 diseases (influenza), medical equipment (ECMO, Extra-Corporeal Membrane  
55 Oxygenation), and drugs (Tamiflu), which were selected for estimating public  
56 opinion. As shown in Figure 6, a severe earthquake occurred on the Chinese New  
57  
58  
59  
60

Year holiday (week 18; February 6, 2016). The media and opinion leaders focused on the earthquake, and therefore, these keywords research relative intensities did not increase simultaneously while the peak of epidemic disease was presented. (weeks 18–21; February 2016). After the Chinese New Year holiday, the media and opinion leaders refocused the discussions of influenza, including the issue of the influenza outbreak, the flu-vaccine policy, and the medical resource rearrangement, etc. Those affected public opinion and cause a public relation crisis for the Taiwan government in epidemic policy. Thus, the group C keywords research relative intensities reached the peak from the end of February to mid-March (weeks 20 – 25). There was 4-weeks lag between the Internet query data and epidemic advance. Figure 6 also showed the peak of the keyword “流感 (influenza)” was presented in week 23 (early March), with a simultaneously elevated level of two keywords for medical equipment and drugs. Altogether, these indicated that appropriate non-English language (Chinese) keywords reflect the concerns of media and opinion leaders regarding epidemic diseases.

### Tables

Table 1. Keywords used in Google Trends for this study<sup>a</sup>

| Category               | Query terms                                    |
|------------------------|------------------------------------------------|
| Disease terms          | common cold; influenza; enterovirus            |
| Symptom terms          | fever; cough; runny nose; sore throat; blister |
| Medical equipment term | ECMO (Extra-Corporeal Membrane Oxygenation)    |
| Drug term              | Tamiflu                                        |

<sup>a</sup>The query terms are shown in their English equivalents in table 1; see supplementary table for these terms in traditional Chinese.

Table 2. Pearson correlation coefficient values for cross-correlation with the intensity of influenza related query terms in Taiwan.

| Query terms            | Weekly number of positive influenza tests |                  | The ratio of emergency department patients with ILI |                  | The ratio of outpatient department patients with ILI |                  | Weekly deaths from pneumonia and ILI |                  |
|------------------------|-------------------------------------------|------------------|-----------------------------------------------------|------------------|------------------------------------------------------|------------------|--------------------------------------|------------------|
|                        | No forward                                | One week forward | No forward                                          | One week forward | No forward                                           | One week forward | No forward                           | One week forward |
| <b>感冒/common cold</b>  | <i>r</i> = .898                           | <i>r</i> = .900  | <i>r</i> = .900                                     | <i>r</i> = .899  | <i>r</i> = .889                                      | <i>r</i> = .885  | <i>r</i> = .936                      | <i>r</i> = .936  |
|                        | <i>P</i> < .001                           | <i>P</i> < .001  | <i>P</i> < .001                                     | <i>P</i> < .001  | <i>P</i> < .001                                      | <i>P</i> < .001  | <i>P</i> < .001                      | <i>P</i> < .001  |
|                        | Excellent                                 | Excellent        | Excellent                                           | Excellent        | Excellent                                            | Excellent        | Excellent                            | Excellent        |
| <b>發燒/fever</b>        | <i>r</i> = .773                           | <i>r</i> = .774  | <i>r</i> = .802                                     | <i>r</i> = .807  | <i>r</i> = .791                                      | <i>r</i> = .798  | <i>r</i> = .837                      | <i>r</i> = .843  |
|                        | <i>P</i> < .001                           | <i>P</i> < .001  | <i>P</i> < .001                                     | <i>P</i> < .001  | <i>P</i> < .001                                      | <i>P</i> < .001  | <i>P</i> < .001                      | <i>P</i> < .001  |
|                        | Good                                      | Good             | Excellent                                           | Excellent        | Good                                                 | Good             | Excellent                            | Excellent        |
| <b>咳嗽/cough</b>        | <i>r</i> = .796                           | <i>r</i> = .793  | <i>r</i> = .886                                     | <i>r</i> = .883  | <i>r</i> = .870                                      | <i>r</i> = .864  | <i>r</i> = .913                      | <i>r</i> = .911  |
|                        | <i>P</i> < .001                           | <i>P</i> < .001  | <i>P</i> < .001                                     | <i>P</i> < .001  | <i>P</i> < .001                                      | <i>P</i> < .001  | <i>P</i> < .001                      | <i>P</i> < .001  |
|                        | Good                                      | Good             | Excellent                                           | Excellent        | Excellent                                            | Excellent        | Excellent                            | Excellent        |
| <b>流鼻水/runny nose</b>  | <i>r</i> = .238                           | <i>r</i> = .212  | <i>r</i> = .145                                     | <i>r</i> = .212  | <i>r</i> = .119                                      | <i>r</i> = .076  | <i>r</i> = .263                      | <i>r</i> = .230  |
|                        | <i>P</i> = .24                            | <i>P</i> = .31   | <i>P</i> = .48                                      | <i>P</i> = .61   | <i>P</i> = .56                                       | <i>P</i> = .72   | <i>P</i> = .19                       | <i>P</i> = .27   |
|                        | Poor                                      | Poor             | Poor                                                | Poor             | Poor                                                 | Poor             | Poor                                 | Poor             |
| <b>喉嚨痛/sore throat</b> | <i>r</i> = .640                           | <i>r</i> = .630  | <i>r</i> = .766                                     | <i>r</i> = .760  | <i>r</i> = .753                                      | <i>r</i> = .744  | <i>r</i> = .783                      | <i>r</i> = .775  |
|                        | <i>P</i> < .001                           | <i>P</i> < .001  | <i>P</i> < .001                                     | <i>P</i> < .001  | <i>P</i> < .001                                      | <i>P</i> < .001  | <i>P</i> < .001                      | <i>P</i> < .001  |
|                        | Good                                      | Good             | Good                                                | Good             | Good                                                 | Good             | Good                                 | Good             |

Table 3. Pearson correlation coefficient values for cross-correlation with the intensity of enterovirus related query terms in Taiwan.

| Query terms            | The ratio of emergency department patients with enteroviruses infection |
|------------------------|-------------------------------------------------------------------------|
| 腸病毒/ <b>entervirus</b> | $r = .914$                                                              |
|                        | $P < .001$                                                              |
|                        | Excellent                                                               |
| 水泡/ <b>Blister</b>     | $r = .478$                                                              |
|                        | $P < .001$                                                              |
|                        | Moderate                                                                |
| 發燒/ <b>Fever</b>       | $r = .359$                                                              |
|                        | $P < .001$                                                              |
|                        | Poor                                                                    |

#### Figure legends

Figure 1: Temporal comparison of keywords research relative intensity and weekly number of positive influenza tests. (October 4, 2015, to April 2, 2016)

Figure 2: Temporal comparison of keywords research relative intensity and the ratio of emergency department patients with ILI. (October 4, 2015, to April 2, 2016)

Figure 3: Temporal comparison of keywords research relative intensity and the ratio of outpatient department patients with ILI. (October 4, 2015, to April 2, 2016)

Figure 4: Temporal comparison of keywords research relative intensity and weekly death of pneumonia and ILI patients. (October 4, 2015, to April 2, 2016)

Figure 5: Temporal comparison of keywords research relative intensity and the ratio of emergency department patients with enteroviruses infection in Taiwan. (January 1, 2012, to December 29, 2012)

Figure 6: Temporal comparison of keywords research relative intensity and weekly number of positive influenza tests. (October 4, 2015, to April 2, 2016)

## Discussion

### Principal findings

This study confirmed that suitable non-English language (Chinese) keywords Google research relative intensities are favorable epidemic disease surveillance tools in non-English language country. Moreover, suitable keywords that were sensitive and specific to the public opinion regarding epidemic disease were identified. Keywords such as standard names of diseases, medical equipment, and drugs [e.g. “流感” (Influenza), “葉克膜” (ECMO), and “克流感” (Tamiflu)] were highly sensitive and effective for estimating public opinion. The web search engine, such as Google trends, have been suggested better suited to be the disease surveillance in developed countries, which have large populations of internet search users.<sup>29</sup> However, there are few forecasting tools for epidemic diseases based on web queries data; despite the Internet usage is really high in Taiwan. Thus, we aimed to assess whether non-English language (Chinese) Google Trends can be used as an epidemic surveillance system and further application in monitoring public opinion and managing public relations. These results highlight the potential use of Internet activity related to epidemic diseases for coordinating the supply of medical resources and managing public opinion during influenza outbreaks. For assessing health-related information on the Internet, Google Trends can combine critical data from a large spectrum of the population with geospatial data to create a selected geographical surveillance system. The previous studies had proved the effectiveness of social media in the infectious disease surveillance in many countries, such as United States, Japan, South Korea, China, Greece, and Italy.<sup>16 19 30-33</sup> These findings revealed suitable queries in different languages were available for the application in the epidemic prediction and clinician study. To our best knowledge, our study is first to estimate the correlation between infectious diseases and Internet search activities in Taiwan. The web user’s education level, economic situation, cultural and language backgrounds can influence the local habits of Internet searchers.<sup>29</sup> Comparing to the previous reports,<sup>19 24</sup> we identified certain Chinese query terms with significant correlation with epidemic forecasting system, including “common cold” for influenza ( $r=.898, P<.001$ ) and “enterovirus” for EN71 infection ( $r=.914, P<.001$ ). These suggested the web query based surveillance system is available in the local language queries for disease prediction but not for international languages, such as English or Simplified Chinese.

Search engines and social media enable people to share information and their experiences in a crisis, as well as to assess message credibility and receive confirmation.<sup>13 34</sup> Internet data should be incorporated into clinical data for risk and crisis management. Furthermore, Internet activity can provide a quantifiable varying assessment of public opinion during a particular disease outbreak to health authorities, researchers, and the media.

The social amplification of risk explains how public risk perception is formed by psychology, mass communication, and cultural factors that result in enhancing or attenuating the public attention to risk. This study can be extended to quantify social uneasiness and fear during outbreaks and catastrophes and delivered information

1  
2  
3 through social media platforms. Moreover, our approach indicates that a surveillance  
4 system based on Internet activity can be an essential tool for assessing epidemic  
5 diseases and public opinions during epidemics and catastrophes in non-English  
6 language countries.  
7

### 8 9 **Limitations**

10 Some limitations existed in this study. First, our findings mainly focused on ILI and  
11 EN71 infection. The forecasting effects of web queries data in the other seasonal  
12 infectious diseases were not clear so far. Our future works will persist to develop  
13 more prediction models based on Internet big data to improve the effectiveness of  
14 epidemics surveillance in Taiwan. Second, although our research had been  
15 introduced to the pandemic in the recent 5 years in Taiwan, the evaluated period was  
16 too short to well represent the long-term condition. Actually, our approach was to  
17 provide the additional application in web search data, such as Google, which is the  
18 most-used search engine in Taiwan. After then, it will encourage more searchers to  
19 use the “big data” from social media to track and predict the disease. Third, we only  
20 enrolled the single queries data for Google Trends, despite it was the mainly tracking  
21 resource in Taiwan. In the future, we will evaluate the epidemic predictions in specific  
22 region or language approaches, to establish broad benefits for non-English countries  
23 [e.g. the search intensity for “erupção” (the Portuguese term for rash) for detecting  
24 Zika virus fever in Brazil; see Multimedia Appendix 2], and further utilize other  
25 sources of Internet data, including Tweets, Baidu, Yahoo!, or other social media, and  
26 to evaluate whether they provide the information in “infodemiology”.<sup>35 36</sup>  
27  
28  
29  
30

### 31 **Conclusions**

32 Our study demonstrated that non-English language (Chinese) keywords Google  
33 search relative intensities are highly effective for estimating the level of epidemic  
34 diseases on the basis of people’s search behavior. These results suggested the medical  
35 information derived from the online resource can play a significant role in the current  
36 epidemic surveillance system in Taiwan.  
37

### 38 **Acknowledgements**

39 All authors listed in the manuscript contributed equally. We all participated in study  
40 design, data collection, statistics analysis, and manuscript drafting. In addition, this  
41 study is based on epidemic data from Taiwan center for disease control, and query  
42 data from Google Trends.  
43  
44

### 45 **Author Contributions**

46 All the listed authors made substantial contributions to the conception and design of  
47 the project. Yu-Wei Chang and Wei-Lun Chiang conceived and designed the project;  
48 Chun-Yu Lin provided the clinical knowledge; Yu-Wei Chang, Wen-Hung Wang, Ling-  
49 Chien Hung, and Yi-Chang Tsai performed the experimental works; Yu-Wei Chang and  
50 Wei-Lun Chiang interpreted the analyzed results and drafted the manuscript. Yen-  
51 Hsu Chen is the guarantor of integrity of the entire study and responsible to edit and  
52 finally review the paper. All authors have read and approved the final vision to be  
53 submitted.  
54  
55  
56  
57  
58  
59  
60

### Funding

This project received no specific grant from any funding agency in the public, commercial or not-for-profit sectors.

### Conflicts of Interest

None declared

### Abbreviations

ILI: Influenza-like illness

TCDC: Taiwan center for disease control

EN71: enterovirus 71

ECMO: Extra-Corporeal Membrane Oxygenation

### Supplementary material

Supplementary table 1: List of the Chinese query terms used in the study and their English equivalents.

|                               | English equivalent | Traditional Chinese query terms |
|-------------------------------|--------------------|---------------------------------|
| <b>Disease terms</b>          |                    |                                 |
|                               | common cold        | 感冒                              |
|                               | influenza          | 流感                              |
|                               | enterovirus        | 腸病毒                             |
| <b>Symptom terms</b>          |                    |                                 |
|                               | fever              | 發燒                              |
|                               | cough              | 咳嗽                              |
|                               | running nose       | 流鼻水                             |
|                               | sore throat        | 喉嚨痛                             |
|                               | blister            | 水泡                              |
| <b>Medical equipment term</b> |                    |                                 |
|                               | ECOM               | 葉克膜                             |
| <b>Drug term</b>              |                    |                                 |
|                               | Tamiflu            | 克流感                             |

Supplementary figure 1: Temporal comparison of major event of unknown exanthematous illness in Salvador, Brazil and Portuguese keywords research relative intensity (Language: Portuguese; search terms: erupção (rash); artralgia (artralgia); olhos vermelhos (red eyes); location: Brazil; time: January 4, 2015 to September 5, 2015)



## References

1. Jajosky RA, Groseclose SL. Evaluation of reporting timeliness of public health surveillance systems for infectious diseases. *BMC public health* 2004;4:29. doi: 10.1186/1471-2458-4-29
2. SteelFisher GK, Blendon RJ, Bekheit MM, et al. The public's response to the 2009 H1N1 influenza pandemic. *The New England journal of medicine* 2010;362(22):e65. doi: 10.1056/NEJMp1005102
3. Wang HW, Chen DR, Yu HW, et al. Forecasting the Incidence of Dementia and Dementia-Related Outpatient Visits With Google Trends: Evidence From Taiwan. *Journal of medical Internet research* 2015;17(11):e264. doi: 10.2196/jmir.4516
4. Wang HW, Chen DR. Economic Recession and Obesity-Related Internet Search Behavior in Taiwan: Analysis of Google Trends Data. *JMIR public health and surveillance* 2018;4(2):e37. doi: 10.2196/publichealth.7314
5. Leal Neto OB, Albuquerque CM, Albuquerque JO, et al. The schisto track: a system for gathering and monitoring epidemiological surveys by connecting geographical information systems in real time. *JMIR Mhealth Uhealth* 2014;2(1):e10-e10. doi: 10.2196/mhealth.2859
6. Majumder MS, Santillana M, Mekaruru SR, et al. Utilizing Nontraditional Data Sources for Near Real-Time Estimation of Transmission Dynamics During the 2015-2016 Colombian Zika Virus Disease Outbreak. *JMIR public health and surveillance* 2016;2(1):e30. doi: 10.2196/publichealth.5814
7. Bonacic Marinovic A, Swaan C, van Steenberg J, et al. Quantifying reporting timeliness to improve outbreak control. *Emerging infectious diseases* 2015;21(2):209-16. doi: 10.3201/eid2102.130504
8. Wang MH, Chen HK, Hsu MH, et al. Cloud Computing for Infectious Disease Surveillance and Control: Development and Evaluation of a Hospital Automated Laboratory Reporting System. *Journal of medical Internet research* 2018;20(8):e10886. doi: 10.2196/10886
9. Ginsberg J, Mohebbi MH, Patel RS, et al. Detecting influenza epidemics using search engine query data. *Nature* 2009;457(7232):1012-4. doi: 10.1038/nature07634
10. Miller M, Banerjee T, Muppalla R, et al. What Are People Tweeting About Zika? An Exploratory Study Concerning Its Symptoms, Treatment, Transmission, and Prevention. *JMIR public health and surveillance* 2017;3(2):e38. doi: 10.2196/publichealth.7157
11. Du J, Tang L, Xiang Y, et al. Public Perception Analysis of Tweets During the 2015 Measles Outbreak: Comparative Study Using Convolutional Neural Network Models. *Journal of medical Internet research* 2018;20(7):e236. doi: 10.2196/jmir.9413
12. Schootman M, Toor A, Cavazos-Rehg P, et al. The utility of Google Trends data to examine interest in cancer screening. *BMJ Open* 2015;5(6):e006678. doi: 10.1136/bmjopen-2014-006678



13. Asch JM, Asch DA, Klinger EV, et al. Google search histories of patients presenting to an emergency department: an observational study. *BMJ Open* 2019;9(2):e024791. doi: 10.1136/bmjopen-2018-024791
14. Odlum M, Yoon S. What can we learn about the Ebola outbreak from tweets? *American journal of infection control* 2015;43(6):563-71. doi: 10.1016/j.ajic.2015.02.023
15. Fung IC, Fu KW, Ying Y, et al. Chinese social media reaction to the MERS-CoV and avian influenza A(H7N9) outbreaks. *Infectious diseases of poverty* 2013;2(1):31. doi: 10.1186/2049-9957-2-31
16. Woo H, Cho Y, Shim E, et al. Estimating Influenza Outbreaks Using Both Search Engine Query Data and Social Media Data in South Korea. *Journal of medical Internet research* 2016;18(7):e177. doi: 10.2196/jmir.4955
17. Klembczyk JJ, Jalalpour M, Levin S, et al. Google Flu Trends Spatial Variability Validated Against Emergency Department Influenza-Related Visits. *Journal of medical Internet research* 2016;18(6):e175. doi: 10.2196/jmir.5585
18. Cho S, Sohn CH, Jo MW, et al. Correlation between national influenza surveillance data and google trends in South Korea. *PloS one* 2013;8(12):e81422. doi: 10.1371/journal.pone.0081422
19. Kang M, Zhong H, He J, et al. Using Google Trends for Influenza Surveillance in South China. *PloS one* 2013;8(1):e55205. doi: 10.1371/journal.pone.0055205
20. Yang J-R, Teng H-J, Liu M-T, et al. Taiwan's Public Health National Laboratory System: Success in Influenza Diagnosis and Surveillance. *Health Secur* 2017;15(2):154-64. doi: 10.1089/hs.2016.0104
21. Google Trends. URL: <https://www.google.com/trends/> [Accessed: 2018-12-04] (Archived by WebCite® at <http://www.webcitation.org/74PPqrP4j>)
22. Dugas AF, Hsieh YH, Levin SR, et al. Google Flu Trends: correlation with emergency department influenza rates and crowding metrics. *Clinical infectious diseases : an official publication of the Infectious Diseases Society of America* 2012;54(4):463-9. doi: 10.1093/cid/cir883
23. Kadry B, Chu LF, Kadry B, et al. Analysis of 4999 online physician ratings indicates that most patients give physicians a favorable rating. *Journal of medical Internet research* 2011;13(4):e95. doi: 10.2196/jmir.1960
24. Ortiz JR, Zhou H, Shay DK, et al. Monitoring influenza activity in the United States: a comparison of traditional surveillance systems with Google Flu Trends. *PloS one* 2011;6(4):e18687. doi: 10.1371/journal.pone.0018687
25. Schmidt NJ, Lennette EH, Ho HH. An apparently new enterovirus isolated from patients with disease of the central nervous system. *The Journal of infectious diseases* 1974;129(3):304-9. doi: 10.1093/infdis/129.3.304
26. Chia MY, Chiang PS, Chung WY, et al. Epidemiology of enterovirus 71 infections in Taiwan. *Pediatrics and neonatology* 2014;55(4):243-9. doi: 10.1016/j.pedneo.2013.07.007
27. Li K, Li X, Si W, et al. Identifying risk factors for neurological complications and monitoring long-term neurological sequelae: protocol for the Guangzhou prospective cohort study on hand-foot-and-mouth disease. *BMJ Open* 2019;9(2):e027224. doi: 10.1136/bmjopen-2018-027224

- 1  
2  
3  
4  
5  
6  
7  
8  
9  
10  
11  
12  
13  
14  
15  
16  
17  
18  
19  
20  
21  
22  
23  
24  
25  
26  
27  
28  
29  
30  
31  
32  
33  
34  
35  
36  
37  
38  
39  
40  
41  
42  
43  
44  
45  
46  
47  
48  
49  
50  
51  
52  
53  
54  
55  
56  
57  
58  
59  
60
28. Young SD, Konda K, Caceres C, et al. Effect of a community popular opinion leader HIV/STI intervention on stigma in urban, coastal Peru. *AIDS and behavior* 2011;15(5):930-7. doi: 10.1007/s10461-010-9826-5
  29. Carneiro HA, Mylonakis E. Google trends: a web-based tool for real-time surveillance of disease outbreaks. *Clinical infectious diseases : an official publication of the Infectious Diseases Society of America* 2009;49(10):1557-64. doi: 10.1086/630200
  30. Santillana M, Nguyen AT, Dredze M, et al. Combining Search, Social Media, and Traditional Data Sources to Improve Influenza Surveillance. *PLoS computational biology* 2015;11(10):e1004513. doi: 10.1371/journal.pcbi.1004513 [published Online First: 2015/10/30]
  31. Sugawara T, Ohkusa Y, Ibuka Y, et al. Real-time prescription surveillance and its application to monitoring seasonal influenza activity in Japan. *Journal of medical Internet research* 2012;14(1):e14. doi: 10.2196/jmir.1881
  32. Samaras L, Garcia-Barriocanal E, Sicilia MA. Syndromic Surveillance Models Using Web Data: The Case of Influenza in Greece and Italy Using Google Trends. *JMIR public health and surveillance* 2017;3(4):e90. doi: 10.2196/publichealth.8015
  33. Hagihara A, Onozuka D, Miyazaki S, et al. Influenza newspaper reports and the influenza epidemic: an observational study in Fukuoka City, Japan. *BMJ Open* 2015;5(12):e009900. doi: 10.1136/bmjopen-2015-009900
  34. Kim Y, Huang J, Emery S. Garbage in, Garbage Out: Data Collection, Quality Assessment and Reporting Standards for Social Media Data Use in Health Research, Infodemiology and Digital Disease Detection. *Journal of medical Internet research* 2016;18(2):e41. doi: 10.2196/jmir.4738
  35. Eysenbach G. Infodemiology and infoveillance: framework for an emerging set of public health informatics methods to analyze search, communication and publication behavior on the Internet. *Journal of medical Internet research* 2009;11(1):e11. doi: 10.2196/jmir.1157
  36. Petersen J, Simons H, Patel D, et al. Early detection of perceived risk among users of a UK travel health website compared with internet search activity and media coverage during the 2015–2016 Zika virus outbreak: an observational study. *BMJ Open* 2017;7(8):e015831. doi: 10.1136/bmjopen-2017-015831

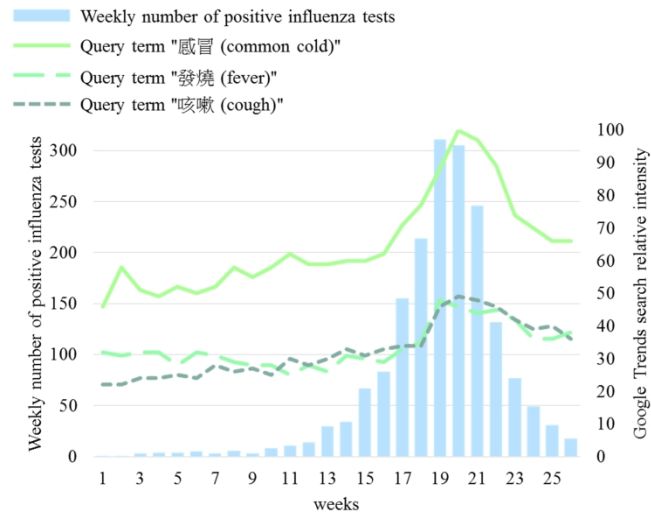

Figure 1. Temporal comparison of keywords research relative intensity and weekly number of positive influenza tests. (October 4, 2015, to April 2, 2016)

338x190mm (300 x 300 DPI)

1  
2  
3  
4  
5  
6  
7  
8  
9  
10  
11  
12  
13  
14  
15  
16  
17  
18  
19  
20  
21  
22  
23  
24  
25  
26  
27  
28  
29  
30  
31  
32  
33  
34  
35  
36  
37  
38  
39  
40  
41  
42  
43  
44  
45  
46  
47  
48  
49  
50  
51  
52  
53  
54  
55  
56  
57  
58  
59  
60

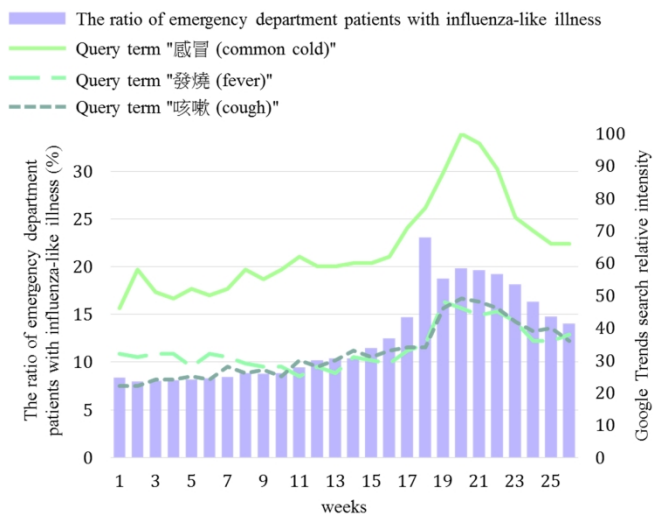

Figure 2. Temporal comparison of keywords research relative intensity and the ratio of emergency department patients with ILI. (October 4, 2015, to April 2, 2016)

338x190mm (300 x 300 DPI)

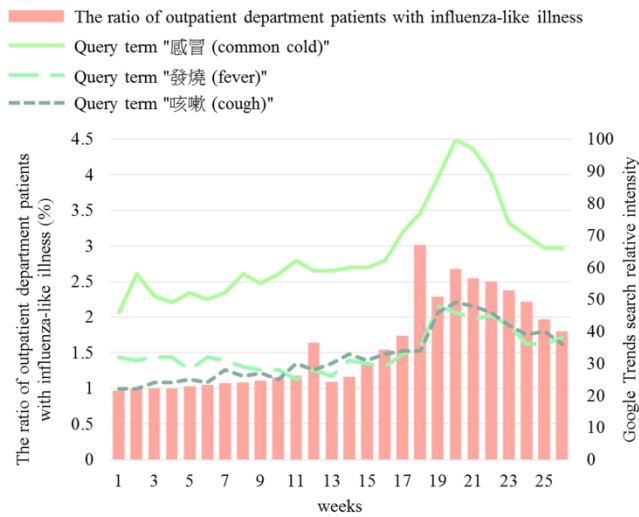

Figure 3. Temporal comparison of keywords research relative intensity and the ratio of outpatient department patients with ILI. (October 4, 2015, to April 2, 2016)

338x190mm (300 x 300 DPI)

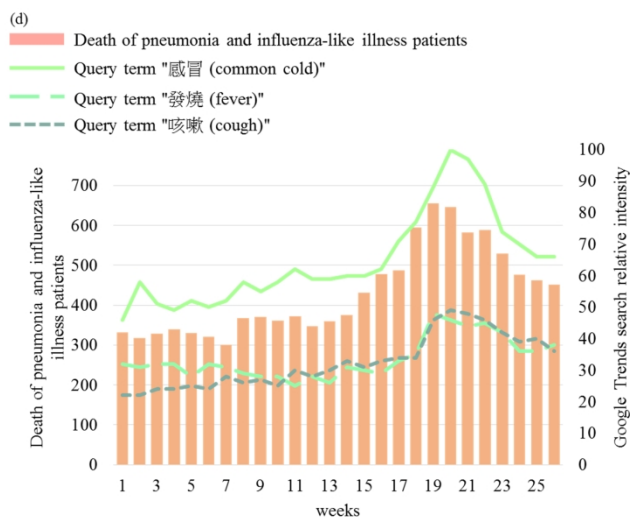

Figure 4. Temporal comparison of keywords research relative intensity and weekly death of pneumonia and ILI patients. (October 4, 2015, to April 2, 2016)

338x190mm (300 x 300 DPI)

1  
2  
3  
4  
5  
6  
7  
8  
9  
10  
11  
12  
13  
14  
15  
16  
17  
18  
19  
20  
21  
22  
23  
24  
25  
26  
27  
28  
29  
30  
31  
32  
33  
34  
35  
36  
37  
38  
39  
40  
41  
42  
43  
44  
45  
46  
47  
48  
49  
50  
51  
52  
53  
54  
55  
56  
57  
58  
59  
60

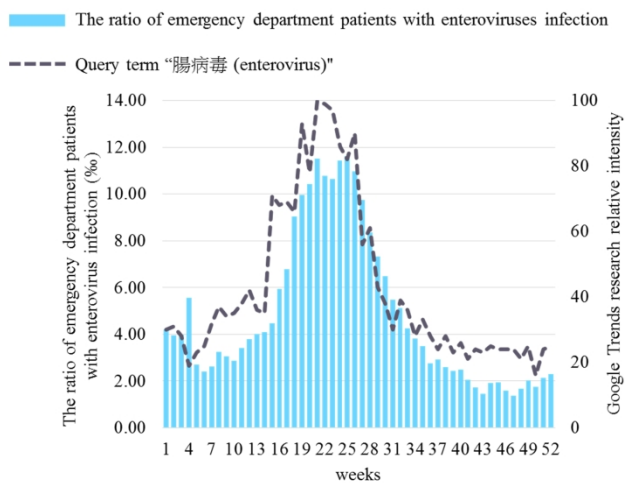

Figure 5. Temporal comparison of keywords research relative intensity and the ratio of emergency department patients with enterovirus infection in Taiwan. (January 1, 2012, to December 29, 2012)

338x190mm (300 x 300 DPI)

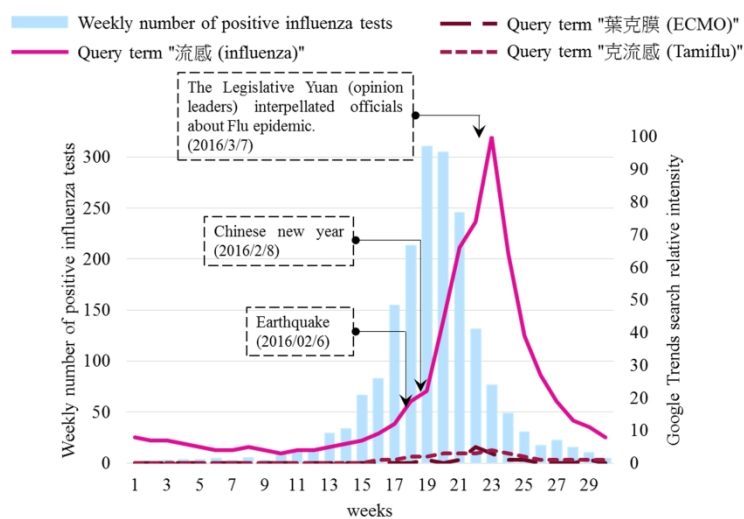

Figure 6. Temporal comparison of keywords research relative intensity and weekly number of positive influenza tests. (October 4, 2015, to April 2, 2016)

338x190mm (300 x 300 DPI)



1  
2  
3  
4  
5  
6  
7  
8  
9  
10  
11  
12  
13  
14  
15  
16  
17  
18  
19  
20  
21  
22  
23  
24  
25  
26  
27  
28  
29  
30  
31  
32  
33  
34  
35  
36  
37  
38  
39  
40  
41  
42  
43  
44  
45  
46  
47  
48  
49  
50  
51  
52  
53  
54  
55  
56  
57  
58  
59  
60

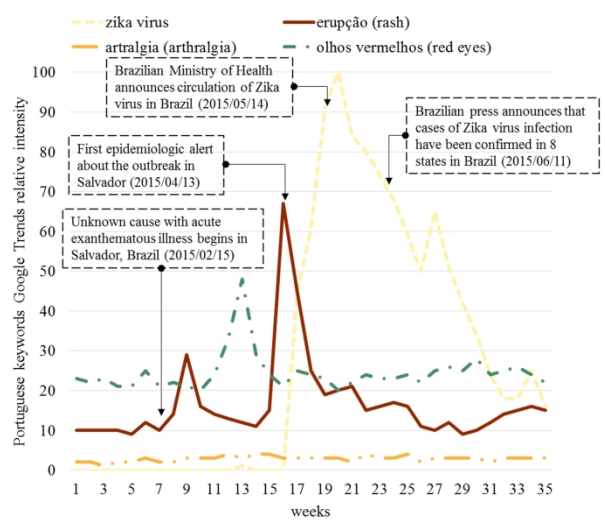

338x190mm (300 x 300 DPI)

STROBE Statement—Checklist of items that should be included in reports of *cross-sectional studies*

|                              | Item No | Recommendation                                                                                                                                                                                               | Page No |
|------------------------------|---------|--------------------------------------------------------------------------------------------------------------------------------------------------------------------------------------------------------------|---------|
| <b>Title and abstract</b>    | 1       | (a) Indicate the study's design with a commonly used term in the title or the abstract                                                                                                                       | 2       |
|                              |         | (b) Provide in the abstract an informative and balanced summary of what was done and what was found                                                                                                          | 2       |
| <b>Introduction</b>          |         |                                                                                                                                                                                                              |         |
| Background/rationale         | 2       | Explain the scientific background and rationale for the investigation being reported                                                                                                                         | 3       |
| Objectives                   | 3       | State specific objectives, including any prespecified hypotheses                                                                                                                                             | 4       |
| <b>Methods</b>               |         |                                                                                                                                                                                                              |         |
| Study design                 | 4       | Present key elements of study design early in the paper                                                                                                                                                      | 4       |
| Setting                      | 5       | Describe the setting, locations, and relevant dates, including periods of recruitment, exposure, follow-up, and data collection                                                                              | 4       |
| Participants                 | 6       | (a) Give the eligibility criteria, and the sources and methods of selection of participants                                                                                                                  | 4       |
| Variables                    | 7       | Clearly define all outcomes, exposures, predictors, potential confounders, and effect modifiers. Give diagnostic criteria, if applicable                                                                     | 5       |
| Data sources/<br>measurement | 8*      | For each variable of interest, give sources of data and details of methods of assessment (measurement). Describe comparability of assessment methods if there is more than one group                         | 4       |
| Bias                         | 9       | Describe any efforts to address potential sources of bias                                                                                                                                                    | NA      |
| Study size                   | 10      | Explain how the study size was arrived at                                                                                                                                                                    | 4       |
| Quantitative variables       | 11      | Explain how quantitative variables were handled in the analyses. If applicable, describe which groupings were chosen and why                                                                                 | 4       |
| Statistical methods          | 12      | (a) Describe all statistical methods, including those used to control for confounding                                                                                                                        | 5       |
|                              |         | (b) Describe any methods used to examine subgroups and interactions                                                                                                                                          | 5       |
|                              |         | (c) Explain how missing data were addressed                                                                                                                                                                  | NA      |
|                              |         | (d) If applicable, describe analytical methods taking account of sampling strategy                                                                                                                           | NA      |
|                              |         | (e) Describe any sensitivity analyses                                                                                                                                                                        | 5       |
| <b>Results</b>               |         |                                                                                                                                                                                                              |         |
| Participants                 | 13*     | (a) Report numbers of individuals at each stage of study—eg numbers potentially eligible, examined for eligibility, confirmed eligible, included in the study, completing follow-up, and analysed            | 5-7     |
|                              |         | (b) Give reasons for non-participation at each stage                                                                                                                                                         | NA      |
|                              |         | (c) Consider use of a flow diagram                                                                                                                                                                           | NA      |
| Descriptive data             | 14*     | (a) Give characteristics of study participants (eg demographic, clinical, social) and information on exposures and potential confounders                                                                     | 5-7     |
|                              |         | (b) Indicate number of participants with missing data for each variable of interest                                                                                                                          | NA      |
| Outcome data                 | 15*     | Report numbers of outcome events or summary measures                                                                                                                                                         | 5-7     |
| Main results                 | 16      | (a) Give unadjusted estimates and, if applicable, confounder-adjusted estimates and their precision (eg, 95% confidence interval). Make clear which confounders were adjusted for and why they were included | 5-7     |

|                          |    |                                                                                                                                                                            |       |
|--------------------------|----|----------------------------------------------------------------------------------------------------------------------------------------------------------------------------|-------|
|                          |    | (b) Report category boundaries when continuous variables were categorized                                                                                                  | NA    |
|                          |    | (c) If relevant, consider translating estimates of relative risk into absolute risk for a meaningful time period                                                           | NA    |
| Other analyses           | 17 | Report other analyses done—eg analyses of subgroups and interactions, and sensitivity analyses                                                                             | 5-7   |
| <b>Discussion</b>        |    |                                                                                                                                                                            |       |
| Key results              | 18 | Summarise key results with reference to study objectives                                                                                                                   | 10    |
| Limitations              | 19 | Discuss limitations of the study, taking into account sources of potential bias or imprecision. Discuss both direction and magnitude of any potential bias                 | 11    |
| Interpretation           | 20 | Give a cautious overall interpretation of results considering objectives, limitations, multiplicity of analyses, results from similar studies, and other relevant evidence | 10-11 |
| Generalisability         | 21 | Discuss the generalisability (external validity) of the study results                                                                                                      | 10-11 |
| <b>Other information</b> |    |                                                                                                                                                                            |       |
| Funding                  | 22 | Give the source of funding and the role of the funders for the present study and, if applicable, for the original study on which the present article is based              | NA    |

\*Give information separately for exposed and unexposed groups.

**Note:** An Explanation and Elaboration article discusses each checklist item and gives methodological background and published examples of transparent reporting. The STROBE checklist is best used in conjunction with this article (freely available on the Web sites of PLoS Medicine at <http://www.plosmedicine.org/>, Annals of Internal Medicine at <http://www.annals.org/>, and Epidemiology at <http://www.epidem.com/>). Information on the STROBE Initiative is available at [www.strobe-statement.org](http://www.strobe-statement.org).

# BMJ Open

## Google Trends-based non-English-language query data and epidemic diseases: a cross-sectional study of the popular search behavior in Taiwan

|                                 |                                                                                                                                                                                                                                                                                                                                                                                                                                                                                                                                                                                                                                                                                                                         |
|---------------------------------|-------------------------------------------------------------------------------------------------------------------------------------------------------------------------------------------------------------------------------------------------------------------------------------------------------------------------------------------------------------------------------------------------------------------------------------------------------------------------------------------------------------------------------------------------------------------------------------------------------------------------------------------------------------------------------------------------------------------------|
| Journal:                        | <i>BMJ Open</i>                                                                                                                                                                                                                                                                                                                                                                                                                                                                                                                                                                                                                                                                                                         |
| Manuscript ID                   | bmjopen-2019-034156.R1                                                                                                                                                                                                                                                                                                                                                                                                                                                                                                                                                                                                                                                                                                  |
| Article Type:                   | Original research                                                                                                                                                                                                                                                                                                                                                                                                                                                                                                                                                                                                                                                                                                       |
| Date Submitted by the Author:   | 20-Feb-2020                                                                                                                                                                                                                                                                                                                                                                                                                                                                                                                                                                                                                                                                                                             |
| Complete List of Authors:       | Chang, Yu-Wei; Kaohsiung Medical University; Taitung Hospital<br>Chiang, Wei-Lun; Pan Media Company; OmnInsight Company<br>Wang, Wen-Hung; Kaohsiung Medical University; Kaohsiung Medical University Chung Ho Memorial Hospital<br>Lin, Chun-Yu; Kaohsiung Medical University; Kaohsiung Medical University Chung Ho Memorial Hospital<br>Hung, Ling-Chien; Kaohsiung Medical University; Kaohsiung Medical University Chung Ho Memorial Hospital<br>Tsai, Yi-Chang; Chang-Hua Hospital Ministry of Health and Welfare<br>Suen, Jau-Ling; Kaohsiung Medical University Hospital, Department of Medical Research<br>Chen, Y.-H. ; Kaohsiung Medical University; Kaohsiung Medical University Chung Ho Memorial Hospital |
| <b>Primary Subject Heading</b>: | Epidemiology                                                                                                                                                                                                                                                                                                                                                                                                                                                                                                                                                                                                                                                                                                            |
| Secondary Subject Heading:      | Epidemiology, Health informatics, Infectious diseases, Public health                                                                                                                                                                                                                                                                                                                                                                                                                                                                                                                                                                                                                                                    |
| Keywords:                       | Health informatics < BIOTECHNOLOGY & BIOINFORMATICS, EPIDEMIOLOGY, PUBLIC HEALTH                                                                                                                                                                                                                                                                                                                                                                                                                                                                                                                                                                                                                                        |
|                                 |                                                                                                                                                                                                                                                                                                                                                                                                                                                                                                                                                                                                                                                                                                                         |

SCHOLARONE™  
Manuscripts



I, the Submitting Author has the right to grant and does grant on behalf of all authors of the Work (as defined in the below author licence), an exclusive licence and/or a non-exclusive licence for contributions from authors who are: i) UK Crown employees; ii) where BMJ has agreed a CC-BY licence shall apply, and/or iii) in accordance with the terms applicable for US Federal Government officers or employees acting as part of their official duties; on a worldwide, perpetual, irrevocable, royalty-free basis to BMJ Publishing Group Ltd ("BMJ") its licensees and where the relevant Journal is co-owned by BMJ to the co-owners of the Journal, to publish the Work in this journal and any other BMJ products and to exploit all rights, as set out in our [licence](#).

The Submitting Author accepts and understands that any supply made under these terms is made by BMJ to the Submitting Author unless you are acting as an employee on behalf of your employer or a postgraduate student of an affiliated institution which is paying any applicable article publishing charge ("APC") for Open Access articles. Where the Submitting Author wishes to make the Work available on an Open Access basis (and intends to pay the relevant APC), the terms of reuse of such Open Access shall be governed by a Creative Commons licence – details of these licences and which [Creative Commons](#) licence will apply to this Work are set out in our licence referred to above.

Other than as permitted in any relevant BMJ Author's Self Archiving Policies, I confirm this Work has not been accepted for publication elsewhere, is not being considered for publication elsewhere and does not duplicate material already published. I confirm all authors consent to publication of this Work and authorise the granting of this licence.

1  
2  
3  
4  
5  
6  
7  
8  
9  
10  
11  
12  
13  
14  
15  
16  
17  
18  
19  
20  
21  
22  
23  
24  
25  
26  
27  
28  
29  
30  
31  
32  
33  
34  
35  
36  
37  
38  
39  
40  
41  
42  
43  
44  
45  
46  
47  
48  
49  
50  
51  
52  
53  
54  
55  
56  
57  
58  
59  
60

1 **TITLE PAGE**

2 **Title:** Google Trends-based non-English-language query data and epidemic  
3 diseases: a cross-sectional study of the popular search behavior in Taiwan

4 **Authors:** Yu-Wei Chang<sup>1,2\*</sup>; Wei-Lun Chiang<sup>3,4\*</sup>; Wen-Hung Wang<sup>5,6</sup>; Chun-Yu  
5 Lin<sup>1,5,6</sup>; Ling-Chien Hung<sup>5,6</sup>; Yi-Chang Tsai<sup>7</sup>; Jau-Ling Suen<sup>1,8,9</sup>; Yen-Hsu Chen<sup>5,6,10,11</sup>,  
6 MD, PhD, MBA

7 **Affiliation:**

8 <sup>1</sup>Graduate Institute of Medicine, College of Medicine, Kaohsiung Medical  
9 University, Kaohsiung, Taiwan

10 <sup>2</sup>Department of Laboratory, Taitung Hospital, Ministry of Health and Welfare,  
11 Taitung, Taiwan

12 <sup>3</sup>Pan Media Company, Taipei, Taiwan

13 <sup>4</sup>OmnInsight Company, Taipei, Taiwan

14 <sup>5</sup>Center for Tropical Medicine and Infectious Disease Research, Kaohsiung Medical  
15 University, Kaohsiung, Taiwan

16 <sup>6</sup>Division of Infectious Disease, Department of Internal Medicine, Kaohsiung  
17 Medical University Hospital, Kaohsiung Medical University, Kaohsiung, Taiwan

18 <sup>7</sup>Department of Laboratory, Chang-Hua Hospital, Ministry of Health and Welfare,  
19 Chang Hua, Taiwan

20 <sup>8</sup>Research Center of Environmental Medicine, Kaohsiung Medical University,  
21 Kaohsiung, Taiwan

22 <sup>9</sup>Department of Medical Research, Kaohsiung Medical University Hospital,  
23 Kaohsiung, Taiwan

24 <sup>10</sup>Department of Internal Medicine, Kaohsiung Municipal Ta-Tung Hospital,  
25 Kaohsiung, Taiwan

26 <sup>11</sup>Department of Biological Science and Technology, College of Biological Science  
27 and Technology, National Chiao Tung University, HsinChu, Taiwan

28 \*These authors contributed equally

29 Correspondence to Yen-Hsu Chen MD, PhD, MBA; [infchen@gmail.com](mailto:infchen@gmail.com)

30

## 31 ABSTRACT

32 **Objective:** This study developed a surveillance system suitable for monitoring  
33 epidemic outbreaks and assessing public opinion in non-English-speaking  
34 countries. We evaluated whether social media reflects social uneasiness and fear  
35 during epidemic outbreaks and natural catastrophes.

36 **Design:** Cross-sectional study.

37 **Setting:** Freely available epidemic data in Taiwan.

38 **Main Outcome Measure:** We used weekly epidemic incidence data obtained from  
39 the Taiwan Centers for Disease Control and online search query data obtained  
40 from Google Trends between October 4, 2015 and April 2, 2016. To validate  
41 whether non-English query keywords were useful surveillance tools, we  
42 estimated the correlation between online query data and epidemic incidence in  
43 Taiwan.

44 **Results:** With our approach, we noted that keywords 感冒 (“common cold”), 發燒  
45 (“fever”), and 咳嗽 (“cough”) exhibited good-to-excellent correlation between  
46 Google Trends query data and influenza incidence ( $r = 0.898, P < 0.001; r = 0.773,$   
47  $P < 0.001; r = 0.796, P < 0.001,$  respectively). They also displayed high correlation  
48 with influenza-like illness emergencies ( $r = 0.900, P < 0.001; r = 0.802, P < 0.001;$   
49  $r = 0.886, P < 0.001,$  respectively) and outpatient visits ( $r = 0.889, P < 0.001; r =$   
50  $0.791, P < 0.001; r = 0.870, P < 0.001,$  respectively). We noted that the query 腸病  
51 毒 (“enterovirus”) exhibited excellent correlation with the number of enterovirus-  
52 infected patients in emergency departments ( $r = 0.914, P < 0.001$ ).

53 **Conclusions:** These results suggested that Google Trends can be a good  
54 surveillance tool for epidemic outbreaks, even in Taiwan, the non-English-  
55 speaking country. Online search activity indicates that people are concerned about  
56 epidemic diseases, even if they do not visit hospitals. This prompted us to develop  
57 useful tools to monitor social media during an epidemic because such media usage  
58 reflects infectious disease trends more quickly than does traditional reporting.

59 **Keywords:** Google Trends; epidemic surveillance tool; non-English language

### 60 **Strengths and Limitations of this study:**

- 61 1. This study analyzed the association between non-English-language queries  
62 and epidemic outbreak incidence in a non-English-speaking country.
- 63 2. Public opinion during infectious outbreaks was assessed in the study.
- 64 3. This study mainly focused on influenza and enterovirus infections, and other  
65 seasonal infectious diseases were not evaluated.

- 1  
2  
3  
4 66 4. Confounders such as educational level, age, and economic conditions should  
5 67 be considered in the future.  
6 68 5. More big data are required to comprehensively study “infodemiology.”  
7  
8

## 69 INTRODUCTION

10 70 Timeliness of response and public opinion are critical in acute epidemic disease  
11 71 control.<sup>1 2</sup> Effective disease surveillance systems and crisis management public  
12 72 relations support public health care efforts and the dissemination of accurate  
13 73 health information.<sup>3-6</sup> Thus, developing an early warning system for epidemics is  
14 74 critical. However, current epidemic surveillance systems depend on information  
15 75 from laboratory test results, outpatient reports, and mortality statistics. Using  
16 76 laboratory results to develop real-time responses involves several weeks of lag  
17 77 before the results are reported.<sup>1</sup> Studies have reported that prolonged delays in  
18 78 reporting during epidemic situations hinder efforts to prevent the spread of  
19 79 infectious diseases.<sup>1 7 8</sup> Furthermore, inadequate timeliness induces negative  
20 80 public opinion and may cause public relations crises for governments.

21 81 With the development of the Internet and social media, scientists have used data  
22 82 from Google Trends, health-related tweets, and self-established cloud platforms  
23 83 to assess the spread of acute epidemic disease activity and improve individual  
24 84 health care.<sup>9-13</sup> Estimating infectious disease levels by analyzing Internet activity  
25 85 enables more sensitive assessments than doing so by studying hospital reports  
26 86 because online activity indicates how concerned people are about epidemic  
27 87 diseases, even when they do not visit hospitals.<sup>14-16</sup> Moreover, tracking diseases  
28 88 through Internet activity requires less effort than is necessary to evaluate  
29 89 laboratory test results and hospital reports.

30 90 Human infection diseases may be characterized by a ubiquitous feature of the  
31 91 seasonal cyclicality, indicating each acute infection has the specific seasonal window  
32 92 of occurrence. However, the seasonality of infectious diseases may vary among  
33 93 geographic locations and differ from other diseases within the same location.<sup>17</sup> For  
34 94 instance, influenza is the major seasonal disease and remains a serious public  
35 95 health threat in Taiwan. It has been well defined that the influenza season in  
36 96 Taiwan usually starts from December, and peaks in January to February of the  
37 97 following year.<sup>18</sup> In addition, enterovirus infection, a significant cause of  
38 98 neurological disorder and death in children, generally has caused outbreaks  
39 99 during the summer months in Taiwan, and epidemics recur with a seasonal  
40 100 pattern.<sup>19</sup>

41 101 Analysis based on the relative intensity of Google keyword searches can provide  
42 102 near-real-time data to be particularly useful in epidemic surveillance and  
43 103 control.<sup>20 21</sup> Internet data analysis has certain advantages over surveys and



104 provides options for narrowing data by country, time period, and language.  
105 However, studies on the value of establishing a surveillance model to estimate  
106 epidemic diseases in non-English-speaking countries have not reached a  
107 consensus.<sup>22-24</sup> Few effective surveillance systems for assessing infectious  
108 diseases based on Internet activity have been developed, despite the ready  
109 availability and use of the Internet and social media in Taiwan. Therefore, the  
110 objectives of this study were to assess whether Google Trends for non-English  
111 words, specifically Chinese words, can be used for an epidemic surveillance  
112 system and for monitoring public opinion and managing public relations.

## 113 **METHODS**

### 114 **Setting and Study Period**

115 National surveillance data on influenza (October 4, 2015 to April 2, 2016) and  
116 enterovirus (January 1, 2012 to December 29, 2012) were obtained from the  
117 Taiwan Centers for Disease Control (TCDC), which regularly collects and manages  
118 epidemiological data from all cities and counties in Taiwan.

### 119 **Data Sources**

#### 120 **Epidemiological Surveillance Data**

121 A survey by the TCDC is employed for national emerging disease surveillance and  
122 disease prevention.<sup>25</sup> For the influenza survey, epidemic data were collected and  
123 categorized by the weekly number of positive influenza tests, the ratio of  
124 emergency department patients with influenza-like illness (ILI), the ratio of  
125 outpatient department patients with ILI, and weekly deaths from pneumonia and  
126 ILI. For the enterovirus survey, the ratio of emergency department patients with  
127 enterovirus infections was obtained. With respect to ethical considerations, the  
128 open data obtained from the TCDC was anonymous and publicly available.

#### 129 **Query Data from Google Trends**

130 Query data were obtained from the Google Trends website provided by Google  
131 Inc.<sup>26</sup> Query trends from Google Trends indicate normalized results (0–100),  
132 which are compared with the maximum value for particular queries during search  
133 intervals.<sup>3</sup> Based on our approach, 10 non-English influenza- and enterovirus-  
134 related search terms were enrolled in the analysis (Table 1); these were related to  
135 names and symptoms of diseases, medical equipment, and drugs. For example,  
136 disease names categorized as query terms included “common cold,” “influenza,”  
137 and “enterovirus.” Table 1 lists epidemic-related categories and query terms, and  
138 Supplementary Table 1 simultaneously lists these terms in Chinese with English  
139 descriptions. Other criteria for analysis of queries were the following: Chinese

1  
2  
3 140 (language), search interval described as above, and Taiwan (location). We set the  
4 141 location to “Taiwan,” search time interval to “October 2015 to March 2016” for  
5 142 influenza, “January 2012 to December 2012” for enterovirus, and the language to  
6 143 “Chinese” and downloaded query information from Google Trends with all search  
7 144 terms in traditional Chinese.

#### 11 145 **Patient and Public Involvement**

12 146 No patients or members of the public were involved in the design and conduct of  
13 147 this study

#### 16 148 **Statistical Analysis**

17 149 Initial analysis was conducted by graphically evaluating data trends according to  
18 150 time. Furthermore, a Pearson correlation analysis was conducted using SAS 9.3  
19 151 (SAS Institute, Cary, NC, USA) to examine the correlation of Google Trends with  
20 152 influenza-related data. 1-week lag forecasting analyses were used to assess these  
21 153 relationships temporally (i.e., correlation analysis through Google-based search of  
22 154 relative intensity for  $N$  weeks and of influenza-related data for  $N + 1$  weeks).  
23 155 Correlation coefficients  $>0.8$  indicated excellent correlation,  $0.6-0.8$  indicated  
24 156 good correlation,  $0.4-0.6$  indicated moderate correlation, and  $<0.4$  indicated poor  
25 157 or no correlation.<sup>27-29</sup>

### 29 158 **RESULTS**

#### 32 159 **Influenza-Like Illness Surveillance Study**

33 160 The TCDC routinely provides open government data for epidemiologic  
34 161 surveillance that is available for infectious disease control and preventive health  
35 162 care studies.<sup>25</sup> First, we evaluated the benefits of influenza surveillance from  
36 163 anonymous logs from online search engine queries. Through this, we collected  
37 164 national influenza surveillance data from October 4, 2015 to April 2, 2016. During  
38 165 this interval, an influenza outbreak, a natural disaster, and an earthquake, were  
39 166 occurred in Taiwan. This period was suitable to be the research target, which we  
40 167 evaluated whether the Google Trends was suitable to be the surveillance tool of  
41 168 the epidemic disease and the public opinion. A total of 10 queries related to  
42 169 influenza (Table 1) were chosen for use in estimating the correlation between  
43 170 query data from Google Trends and influenza-related data obtained from the  
44 171 TCDC concerning the weekly number of patients with influenza, ratio of  
45 172 emergency department patients with ILI, ratio of outpatient department patients  
46 173 with ILI, and weekly deaths from pneumonia and ILI. As shown in Figure 1, a peak  
47 174 indicating the number of patients with influenza was observed in February 2016  
48 175 (Weeks 6–9); simultaneously elevated levels were evident for three other

1  
2  
3  
4 176 influenza-related data categories (Figures 2–4). Figures 1–4 graphically represent  
5 177 the temporal relationship between and illustrate evident increases in four  
6 178 influenza-related data categories with a simultaneous increase in the relative  
7 179 intensity of Google keywords. After February 2016, the four influenza-related data  
8 180 categories and all keywords decreased simultaneously from March 2016 (after  
9 181 Week 10). Table 2 lists the correlation coefficients between Google keyword  
10 182 search intensity and influenza-related data for “no lag” and “1-week lag.” These  
11 183 indicate that non-English keywords, such as 感冒 (“common cold,”  $r = 0.898$ ,  $P <$   
12 184  $0.001$ ), 發燒 (“fever,”  $r = 0.773$ ,  $P < 0.001$ ), and 咳嗽 (“cough,”  $r = 0.796$ ,  $P < 0.001$ ),  
13 185 had a high correlation with the weekly number of positive influenza test results.  
14 186 When 1-week lag was introduced to the forecasting analysis, similar results were  
15 187 observed for these keywords and presented good-to-excellent correlation.  
16 188 Keyword search intensity was also highly correlated with ILI-related medical  
17 189 requests, including the ratio of emergency (or outpatient) department patients  
18 190 with ILI and weekly deaths from pneumonia and ILI. For all correlations, the  
19 191 keyword 感冒 (“common cold”) exhibited the highest correlation of all influenza-  
20 192 related data for “no lag” ( $r = 0.898$ ,  $P < 0.001$ ) and “1-week lag” ( $r = 0.900$ ,  $P <$   
21 193  $0.001$ ) analysis and indicated excellent correlation. However, the search intensity  
22 194 of symptom keywords, such as 流鼻水 (“runny nose,”  $r = 0.076$ – $0.263$ ) and 喉嚨  
23 195 痛 (“sore throat,”  $r = 0.639$ – $0.783$ ) exhibited weaker correlation with influenza-  
24 196 related data (Table 2), which indicated that appropriate non-English (Chinese)  
25 197 keywords reflect influenza levels. Altogether, these results revealed that  
26 198 appropriate non-English (Chinese, such as 感冒, 發燒, and 咳嗽) keyword search  
27 199 intensity can reflect the real-time infectious condition of influenza, including  
28 200 positive rates and overall medical requests for ILI.

#### 201 **EN71 Infection Surveillance Study**

202 Enterovirus 71 (EN71) was first identified in California in the United States in  
203 1969. Since then, EN71 has been detected worldwide.<sup>30</sup> For Taiwan in particular,  
204 EN71 repeatedly causes life-threatening outbreaks of hand, foot, and mouth  
205 disease and neurological disorders in children.<sup>31 32</sup> Using our approach, we  
206 estimated whether query data from Google Trends can serve as a surveillance tool  
207 for EN71 infections in Taiwan. Figure 5 and Table 3 indicate that the query 腸病  
208 毒 (“Enterovirus”) exhibited an excellent correlation ( $r = 0.914$ ,  $P < 0.001$ ) with  
209 the ratio of emergency department patients with EN71 infection. However, using  
210 search terms such as 水泡 (“blister”) or 發燒 (“fever”) exhibited poor-to-moderate  
211 correlation ( $r = 0.478$ ,  $P < 0.001$ ;  $r = 0.359$ ,  $P < 0.001$ , respectively).

## 212 Public Opinion Estimation

213 Public opinion analysis is critical for acute epidemic disease control. Moreover,  
 214 public opinion regarding epidemic diseases is influenced by several external  
 215 factors that can be classified into the categories of culture, media, opinion leaders,  
 216 and major events.<sup>33</sup> Keywords were standard disease names (influenza), medical  
 217 equipment (extracorporeal membrane oxygenation; ECMO), and drugs (Tamiflu),  
 218 which were selected to estimate public opinion. Figure 6 illustrates a severe  
 219 earthquake that occurred during the Chinese New Year holiday (Week 6; February  
 220 6, 2016). Media and opinion leaders focused on the earthquake; therefore, the  
 221 search intensity of these keywords did not increase with the peak in epidemic  
 222 diseases (Weeks 6–9; February 2016). After the Chinese New Year holiday, media  
 223 and opinion leaders refocused on influenza, discussing influenza outbreaks,  
 224 influenza vaccine policies, and medical resource logistics, among other topics.  
 225 These discussions by thought leaders and media affected public opinion and  
 226 caused a public relations crisis for the Taiwanese government regarding epidemic  
 227 policy. Thus, keyword search intensity peaked from the end of February to mid-  
 228 March (Weeks 9–12). A 4-week lag appeared between Internet query data and  
 229 epidemic advancement. Figure 6 shows the peak of the keyword 流感 (“influenza”)  
 230 in Week 11 (early March 2016), with simultaneously elevated levels of two  
 231 keywords for medical equipment and drugs. Altogether, these indicated that  
 232 appropriate non-English (Chinese) keywords reflect the concerns of media and  
 233 opinion leaders regarding epidemic diseases.

## 234 Tables

235 Table 1. Google Trends keywords in this study.<sup>a</sup>

| Category               | Query terms                                    |
|------------------------|------------------------------------------------|
| Disease terms          | common cold, influenza, enterovirus            |
| Symptom terms          | fever, cough, runny nose, sore throat, blister |
| Medical equipment term | ECMO (extra-corporeal membrane oxygenation)    |
| Drug term              | Tamiflu                                        |

236 <sup>a</sup>English equivalents of query terms. See Supplementary Table 1 for the traditional  
 237 Chinese terms.

238

Table 2. Pearson correlation coefficient values for the intensity of influenza-related query terms in Taiwan.

| Query terms            | Weekly number of positive influenza tests |             | The ratio of emergency department patients with ILI |             | The ratio of outpatient department patients with ILI |             | Weekly deaths from pneumonia and ILI |             |
|------------------------|-------------------------------------------|-------------|-----------------------------------------------------|-------------|------------------------------------------------------|-------------|--------------------------------------|-------------|
|                        | No lag                                    | 1-week lag  | No lag                                              | 1-week lag  | No lag                                               | 1-week lag  | No lag                               | 1-week lag  |
| <b>感冒/common cold</b>  | $r = 0.898$                               | $r = 0.900$ | $r = 0.900$                                         | $r = 0.899$ | $r = 0.889$                                          | $r = 0.885$ | $r = 0.936$                          | $r = 0.936$ |
|                        | $P < 0.001$                               | $P < 0.001$ | $P < 0.001$                                         | $P < 0.001$ | $P < 0.001$                                          | $P < 0.001$ | $P < 0.001$                          | $P < 0.001$ |
|                        | Excellent                                 | Excellent   | Excellent                                           | Excellent   | Excellent                                            | Excellent   | Excellent                            | Excellent   |
| <b>發燒/fever</b>        | $r = 0.773$                               | $r = 0.774$ | $r = 0.802$                                         | $r = 0.807$ | $r = 0.791$                                          | $r = 0.798$ | $r = 0.837$                          | $r = 0.843$ |
|                        | $P < 0.001$                               | $P < 0.001$ | $P < 0.001$                                         | $P < 0.001$ | $P < 0.001$                                          | $P < 0.001$ | $P < 0.001$                          | $P < 0.001$ |
|                        | Good                                      | Good        | Excellent                                           | Excellent   | Good                                                 | Good        | Excellent                            | Excellent   |
| <b>咳嗽/cough</b>        | $r = 0.796$                               | $r = 0.793$ | $r = 0.886$                                         | $r = 0.883$ | $r = 0.870$                                          | $r = 0.864$ | $r = 0.913$                          | $r = 0.911$ |
|                        | $P < 0.001$                               | $P < 0.001$ | $P < 0.001$                                         | $P < 0.001$ | $P < 0.001$                                          | $P < 0.001$ | $P < 0.001$                          | $P < 0.001$ |
|                        | Good                                      | Good        | Excellent                                           | Excellent   | Excellent                                            | Excellent   | Excellent                            | Excellent   |
| <b>流鼻水/runny nose</b>  | $r = 0.238$                               | $r = 0.212$ | $r = 0.145$                                         | $r = 0.212$ | $r = 0.119$                                          | $r = 0.076$ | $r = 0.263$                          | $r = 0.230$ |
|                        | $P = 0.24$                                | $P = 0.31$  | $P = 0.48$                                          | $P = 0.61$  | $P = 0.56$                                           | $P = 0.72$  | $P = 0.19$                           | $P = 0.27$  |
|                        | Poor                                      | Poor        | Poor                                                | Poor        | Poor                                                 | Poor        | Poor                                 | Poor        |
| <b>喉嚨痛/sore throat</b> | $r = 0.640$                               | $r = 0.630$ | $r = 0.766$                                         | $r = 0.760$ | $r = 0.753$                                          | $r = 0.744$ | $r = 0.783$                          | $r = 0.775$ |
|                        | $P < 0.001$                               | $P < 0.001$ | $P < 0.001$                                         | $P < 0.001$ | $P < 0.001$                                          | $P < 0.001$ | $P < 0.001$                          | $P < 0.001$ |
|                        | Good                                      | Good        | Good                                                | Good        | Good                                                 | Good        | Good                                 | Good        |

Table 3. Pearson correlation coefficient values for the intensity of enterovirus-related query terms in Taiwan.

| Query terms             | The ratio of emergency department patients with enterovirus infection |
|-------------------------|-----------------------------------------------------------------------|
| 腸病毒/ <b>enterovirus</b> | $r = 0.914$                                                           |
|                         | $P < 0.001$                                                           |
|                         | Excellent                                                             |
| 水泡/ <b>Blister</b>      | $r = 0.478$                                                           |
|                         | $P < 0.001$                                                           |
|                         | Moderate                                                              |
| 發燒/ <b>Fever</b>        | $r = 0.359$                                                           |
|                         | $P < 0.001$                                                           |
|                         | Poor                                                                  |

#### Figure Legends

Figure 1: Temporal comparison of Google Trends search relative intensity and weekly number of positive influenza tests. (October 4, 2015 to April 2, 2016).

Figure 2: Temporal comparison of Google Trends search relative intensity and the ratio of emergency department patients with ILI (October 4, 2015 to April 2, 2016).

Figure 3: Temporal comparison of Google Trends search relative intensity and the ratio of outpatient department patients with ILI (October 4, 2015 to April 2, 2016).

Figure 4: Temporal comparison of Google Trends search relative intensity and weekly deaths of pneumonia and ILI patients. (October 4, 2015 to April 2, 2016).

Figure 5: Temporal comparison of Google Trends search relative intensity and the ratio of emergency department patients with enterovirus infection in Taiwan (January 1, 2012 to December 29, 2012).

Figure 6: Temporal comparison of Google Trends search relative intensity and weekly number of positive influenza tests. (October 4, 2015 to April 2, 2016).



## DISCUSSION

### Principal Findings

This study confirmed that the Google search intensity of appropriate non-English (Chinese) keywords is a favorable epidemic disease surveillance tool in non-English-speaking countries. Moreover, suitable keywords related to public opinion regarding epidemic diseases, such as disease names (流感, “influenza”), medical equipment (克膜, “ECMO”), and drugs (克流感, “Tamiflu”), were useful for estimating public opinion. Online search engine data, such as those of Google Trends, are well-suited for disease surveillance in developed countries, which have large populations of Internet search users.<sup>34</sup> However, few forecasting tools for epidemic diseases are based on online query data, despite the high Internet usage in Taiwan. Thus, we assessed whether non-English (Chinese) keywords that appear in Google Trends can be used for an epidemic surveillance system and to monitor public opinion and manage public relations.

These results highlighted the potential use of Internet activity related to epidemic diseases to coordinate supplies of medical resources and manage public opinion during influenza outbreaks. To assess online health-related information, Google Trends can combine critical data from a large spectrum of the population with geospatial data to create a surveillance system for a selected geographical area.

Studies had demonstrated the benefits of using social media in infectious disease surveillance in many countries, such as the United States, Japan, South Korea, China, Greece, and Italy.<sup>16 23 35-38</sup> These findings have revealed suitable queries in various languages for epidemic prediction and clinical studies. Based on our evidence, certain queries showed a higher correlation with epidemic data (e.g., common cold, fever, and cough in ILI), which may reflect what people concerned about and their web search behaviors in the epidemic outbreak. To the best of our knowledge, our study is the first to estimate the correlation between infectious diseases and Internet searches in Taiwan. However, some possible intrinsic limitations regarding the use of big data on epidemic disease surveillance should be concerned in the study. Algorithms and computational techniques, which are built and rely on the analysis, still need to be carefully refined, tuned, and calibrated to avoid the overfitting risk in Big data inference.<sup>24</sup> For instance, web users' educational level, economic situation, and cultural and language backgrounds can influence users' habits.<sup>34</sup> Comparing to the previous reports,<sup>23</sup> we identified Traditional Chinese query terms that were significantly correlated with epidemic forecasting, including “common cold” for influenza ( $r = 0.898$ ,  $P < 0.001$ ) and “enterovirus” for EN71 infection ( $r = 0.914$ ,  $P < 0.001$ ). These findings suggested an online query-based surveillance system can be available in Taiwan local language queries for disease prediction but not in Simplified Chinese.

Search engines and social media enable people to share information and their experiences during crises, assess message credibility, and receive confirmation of information.<sup>13 39</sup> Internet data should be incorporated into clinical data for risk and

1  
2  
3 crisis management. Furthermore, Internet activity can provide quantifiable  
4 assessments of public opinion during disease outbreaks for health authorities,  
5 researchers, and the media.

6  
7 The social amplification of risk explains how public risk perception is formed by  
8 psychology, mass communication, and cultural factors that enhance or attenuate  
9 public attention to risk. This study can be extended to quantify social uneasiness and  
10 fear during outbreaks and catastrophes and the delivery of information through  
11 social media platforms. Moreover, our approach indicates that a surveillance system  
12 based on Internet activity can be an essential tool for assessing epidemic diseases and  
13 public opinion during epidemics and catastrophes in non-English-speaking countries.  
14  
15

### 16 **Limitations**

17 This study contains some limitations. First, our findings mainly focused on ILI and  
18 EN71 infections. The forecasting effects of online query data for the other seasonal  
19 infectious diseases remain unclear. In the future, we will develop more prediction  
20 models from Internet-derived big data to optimize the predictive accuracy of  
21 epidemic surveillance. Second, although our research related to pandemics occurring  
22 in the past 5 years in Taiwan, the evaluated period was too short to represent long-  
23 term conditions well. Our approach provided additional applications for online  
24 search data collected by companies such as Google, the most-used search engine in  
25 Taiwan. Our study may encourage researchers to use “big data” from social media to  
26 track and predict diseases. Third, we only enrolled single-query data for Google  
27 Trends, despite this being the main tracking resource in Taiwan. In the future, we will  
28 evaluate epidemic predictions in specific regions or language approaches to establish  
29 broad benefits for other non-English-speaking countries and use multiple big data  
30 sources including other social media (Facebook, Twitter, Baidu, or Yahoo!), local  
31 meteorology, and resident consumption behavior to evaluate whether they provide  
32 information for “infodemiology.”<sup>40 41</sup>  
33  
34  
35

### 36 **CONCLUSIONS**

37  
38 Our study demonstrated that non-English (Chinese) keyword Google search intensity  
39 is related to epidemic disease levels as evident in people’s search behavior. These  
40 results suggested that medical information derived from online resources could be a  
41 crucial for addition to the current epidemic surveillance system in Taiwan.  
42

### 43 **ACKNOWLEDGEMENTS**

44 This study is supported partially by Kaohsiung Medical University Research Center  
45 Grant (KMU-TC108B03), Ministry of Science and Technology, Taiwan (MOST 106-  
46 2314-B-037 -087 and MOST 107-2314-B-037 -079 to Y-H Chen) and Ministry of  
47 Health and Welfare, Taiwan (Project No. 10965 to Y-W Chang).  
48  
49

### 50 **CONTRIBUTORS**

51 YW-C and WL-C conceived and designed the project; CY-L provided the clinical  
52 knowledge; YW-C, WH-W, LC-H, and YC-T performed the experimental works; YW-C  
53 and WL-C interpreted the analyzed results and drafted the manuscript. YH-C is the  
54 guarantor of integrity of the entire study and responsible to edit and finally review  
55 the paper. All authors have read and approved the final vision to be submitted  
56  
57  
58  
59



### FUNDING

This project received no specific grant from any funding agency in the public, commercial or not-for-profit sectors.

### CONFLICTS OF INTEREST

None declared

### DATA SHARING STATEMENT

No additional data are available.

### ABBREVIATIONS

ILI: Influenza-like illness

TCDC: Taiwan center for disease control

EN71: enterovirus 71

ECMO: Extra-Corporeal Membrane Oxygenation

### REFERENCE

1. Jajosky RA, Groseclose SL. Evaluation of reporting timeliness of public health surveillance systems for infectious diseases. *BMC Public Health* 2004;4:29-29.
2. SteelFisher GK, Blendon RJ, Bekheit MM, et al. The Public's Response to the 2009 H1N1 Influenza Pandemic. *New England Journal of Medicine* 2010;362(22):e65.
3. Wang H-W, Chen D-R, Yu H-W, et al. Forecasting the Incidence of Dementia and Dementia-Related Outpatient Visits With Google Trends: Evidence From Taiwan. *Journal of medical Internet research* 2015;17(11):e264.
4. Wang H-W, Chen D-R. Economic Recession and Obesity-Related Internet Search Behavior in Taiwan: Analysis of Google Trends Data. *JMIR Public Health Surveill* 2018;4(2):e37.
5. Leal Neto OB, Albuquerque CM, Albuquerque JO, et al. The schisto track: a system for gathering and monitoring epidemiological surveys by connecting geographical information systems in real time. *JMIR Mhealth Uhealth* 2014;2(1):e10-e10.
6. Majumder MS, Santillana M, Mekaru SR, et al. Utilizing Nontraditional Data Sources for Near Real-Time Estimation of Transmission Dynamics During the 2015-2016 Colombian Zika Virus Disease Outbreak. *JMIR Public Health Surveill* 2016;2(1):e30.
7. A M, C S, J vS, et al. Quantifying Reporting Timeliness to Improve Outbreak Control. *Emerg Infect Dis* 2015;21(2):209-16.
8. Wang MH, Chen HK, Hsu MH, et al. Cloud Computing for Infectious Disease Surveillance and Control: Development and Evaluation of a Hospital Automated Laboratory Reporting System. *Journal of medical Internet research* 2018;20(8):e10886.
9. Ginsberg J, Mohebbi MH, Patel RS, et al. Detecting influenza epidemics using search engine query data. *Nature* 2008;457:1012.
10. Miller M, Banerjee T, Muppalla R, et al. What Are People Tweeting About Zika? An Exploratory Study Concerning Its Symptoms, Treatment, Transmission, and Prevention. *JMIR Public Health Surveill* 2017;3(2):e38.

11. Du J, Tang L, Xiang Y, et al. Public Perception Analysis of Tweets During the 2015 Measles Outbreak: Comparative Study Using Convolutional Neural Network Models. *Journal of medical Internet research* 2018;20(7):e236.
12. Schootman M, Toor A, Cavazos-Rehg P, et al. The utility of Google Trends data to examine interest in cancer screening. *BMJ open* 2015;5(6):e006678.
13. Asch JM, Asch DA, Klinger EV, et al. Google search histories of patients presenting to an emergency department: an observational study. *BMJ open* 2019;9(2):e024791.
14. Odlum M, Yoon S. What can we learn about the Ebola outbreak from tweets? *American journal of infection control* 2015;43(6):563-71.
15. Fung IC, Fu KW, Ying Y, et al. Chinese social media reaction to the MERS-CoV and avian influenza A(H7N9) outbreaks. *Infectious diseases of poverty* 2013;2(1):31.
16. Woo H, Cho Y, Shim E, et al. Estimating Influenza Outbreaks Using Both Search Engine Query Data and Social Media Data in South Korea. *Journal of medical Internet research* 2016;18(7):e177.
17. Martinez ME. The calendar of epidemics: Seasonal cycles of infectious diseases. *PLoS Pathog* 2018;14(11):e1007327-e27.
18. Su C-p, Tsou T-P, Chen C-H, et al. Seasonal influenza prevention and control in Taiwan—Strategies revisited. *Journal of the Formosan Medical Association* 2019;118(3):657-63.
19. Chang H-L, Chio C-P, Su H-J, et al. The Association between Enterovirus 71 Infections and Meteorological Parameters in Taiwan. *PLOS ONE* 2012;7(10):e46845.
20. Klembczyk JJ, Jalalpour M, Levin S, et al. Google Flu Trends Spatial Variability Validated Against Emergency Department Influenza-Related Visits. *Journal of medical Internet research* 2016;18(6):e175-e75.
21. Gianfredi V, Bragazzi NL, Mahamid M, et al. Monitoring public interest toward pertussis outbreaks: an extensive Google Trends-based analysis. *Public health* 2018;165:9-15.
22. Cho S, Sohn CH, Jo MW, et al. Correlation between national influenza surveillance data and google trends in South Korea. *PLoS One* 2013;8(12):e81422.
23. Kang M, Zhong H, He J, et al. Using Google Trends for influenza surveillance in South China. *PloS one* 2013;8(1):e55205-e05.
24. Gianfredi V, Bragazzi NL, Nucci D, et al. Harnessing Big Data for Communicable Tropical and Sub-Tropical Disorders: Implications From a Systematic Review of the Literature. *Front Public Health* 2018;6:90-90.
25. Yang J-R, Teng H-J, Liu M-T, et al. Taiwan's Public Health National Laboratory System: Success in Influenza Diagnosis and Surveillance. *Health Secur* 2017;15(2):154-64.
26. Google Trends.
27. Dugas AF, Hsieh YH, Levin SR, et al. Google Flu Trends: correlation with emergency department influenza rates and crowding metrics. *Clinical infectious diseases : an official publication of the Infectious Diseases Society of America* 2012;54(4):463-9.
28. Kadry B, Chu LF, Kadry B, et al. Analysis of 4999 online physician ratings indicates that most patients give physicians a favorable rating. *Journal of medical Internet research* 2011;13(4):e95-e95.

- 1
  - 2
  - 3
  - 4
  - 5
  - 6
  - 7
  - 8
  - 9
  - 10
  - 11
  - 12
  - 13
  - 14
  - 15
  - 16
  - 17
  - 18
  - 19
  - 20
  - 21
  - 22
  - 23
  - 24
  - 25
  - 26
  - 27
  - 28
  - 29
  - 30
  - 31
  - 32
  - 33
  - 34
  - 35
  - 36
  - 37
  - 38
  - 39
  - 40
  - 41
  - 42
  - 43
  - 44
  - 45
  - 46
  - 47
  - 48
  - 49
  - 50
  - 51
  - 52
  - 53
  - 54
  - 55
  - 56
  - 57
  - 58
  - 59
  - 60
29. Ortiz JR, Zhou H, Shay DK, et al. Monitoring influenza activity in the United States: a comparison of traditional surveillance systems with Google Flu Trends. *PLoS One* 2011;6(4):e18687.
30. Schmidt NJ, Lennette EH, Ho HH. An apparently new enterovirus isolated from patients with disease of the central nervous system. *The Journal of infectious diseases* 1974;129(3):304-9.
31. Chia MY, Chiang PS, Chung WY, et al. Epidemiology of enterovirus 71 infections in Taiwan. *Pediatrics and neonatology* 2014;55(4):243-9.
32. Li K, Li X, Si W, et al. Identifying risk factors for neurological complications and monitoring long-term neurological sequelae: protocol for the Guangzhou prospective cohort study on hand-foot-and-mouth disease. *BMJ open* 2019;9(2):e027224.
33. Young SD, Konda K, Caceres C, et al. Effect of a community popular opinion leader HIV/STI intervention on stigma in urban, coastal Peru. *AIDS and behavior* 2011;15(5):930-7.
34. Carneiro HA, Mylonakis E. Google trends: a web-based tool for real-time surveillance of disease outbreaks. *Clinical infectious diseases : an official publication of the Infectious Diseases Society of America* 2009;49(10):1557-64.
35. Santillana M, Nguyen AT, Dredze M, et al. Combining Search, Social Media, and Traditional Data Sources to Improve Influenza Surveillance. *PLOS Computational Biology* 2015;11(10):e1004513.
36. Sugawara T, Ohkusa Y, Ibuka Y, et al. Real-time Prescription Surveillance and its Application to Monitoring Seasonal Influenza Activity in Japan. *Journal of medical Internet research* 2012;14(1):e14.
37. Samaras L, García-Barriocanal E, Sicilia M-A. Syndromic Surveillance Models Using Web Data: The Case of Influenza in Greece and Italy Using Google Trends. *JMIR Public Health Surveill* 2017;3(4):e90.
38. Hagihara A, Onozuka D, Miyazaki S, et al. Influenza newspaper reports and the influenza epidemic: an observational study in Fukuoka City, Japan. *BMJ open* 2015;5(12):e009900.
39. Kim Y, Huang J, Emery S. Garbage in, Garbage Out: Data Collection, Quality Assessment and Reporting Standards for Social Media Data Use in Health Research, Infodemiology and Digital Disease Detection. *Journal of medical Internet research* 2016;18(2):e41.
40. Eysenbach G. Infodemiology and infoveillance: framework for an emerging set of public health informatics methods to analyze search, communication and publication behavior on the Internet. *Journal of medical Internet research* 2009;11(1):e11.
41. Petersen J, Simons H, Patel D, et al. Early detection of perceived risk among users of a UK travel health website compared with internet search activity and media coverage during the 2015-2016 Zika virus outbreak: an observational study. *BMJ open* 2017;7(8):e015831.

1  
2  
3  
4  
5  
6  
7  
8  
9  
10  
11  
12  
13  
14  
15  
16  
17  
18  
19  
20  
21  
22  
23  
24  
25  
26  
27  
28  
29  
30  
31  
32  
33  
34  
35  
36  
37  
38  
39  
40  
41  
42  
43  
44  
45  
46  
47  
48  
49  
50  
51  
52  
53  
54  
55  
56  
57  
58  
59  
60

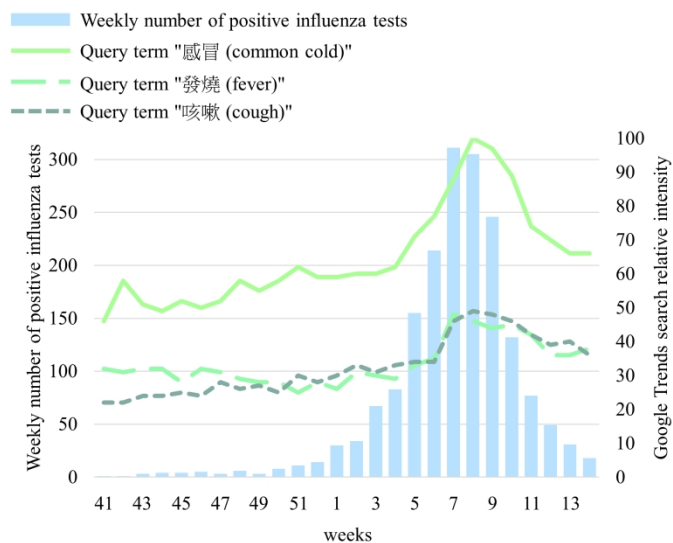

Temporal comparison of Google Trends search relative intensity and weekly number of positive influenza tests. (October 4, 2015 to April 2, 2016).

254x190mm (300 x 300 DPI)

1  
2  
3  
4  
5  
6  
7  
8  
9  
10  
11  
12  
13  
14  
15  
16  
17  
18  
19  
20  
21  
22  
23  
24  
25  
26  
27  
28  
29  
30  
31  
32  
33  
34  
35  
36  
37  
38  
39  
40  
41  
42  
43  
44  
45  
46  
47  
48  
49  
50  
51  
52  
53  
54  
55  
56  
57  
58  
59  
60

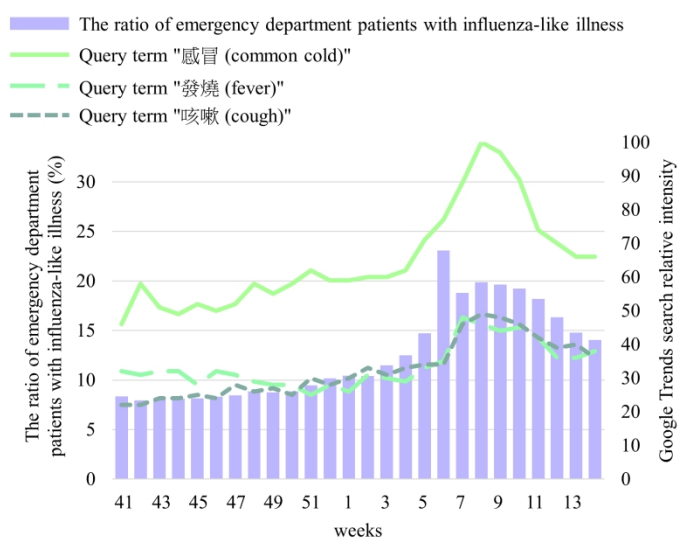

Temporal comparison of Google Trends search relative intensity and the ratio of emergency department patients with ILI (October 4, 2015 to April 2, 2016).

254x190mm (300 x 300 DPI)

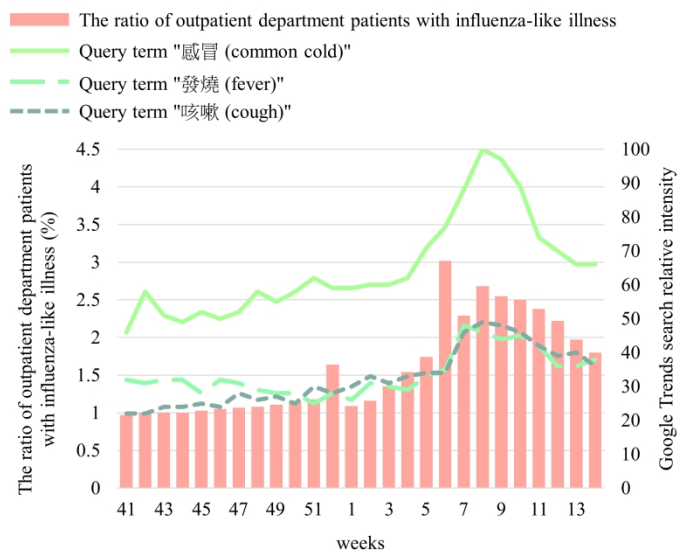

Temporal comparison of Google Trends search relative intensity and the ratio of outpatient department patients with ILI (October 4, 2015 to April 2, 2016).

254x190mm (300 x 300 DPI)

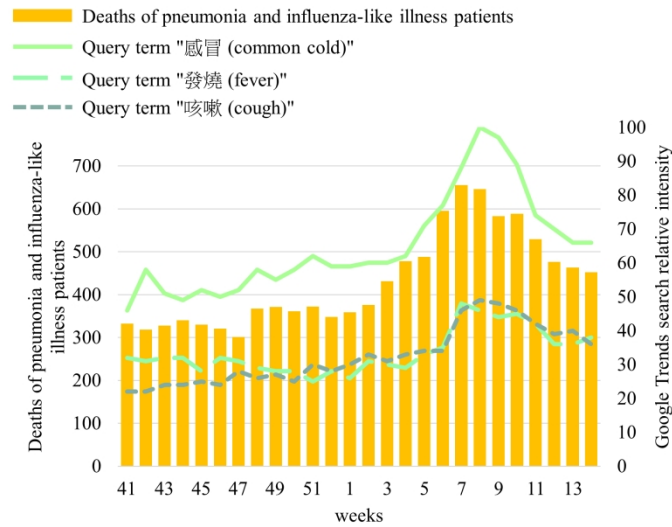

Temporal comparison of Google Trends search relative intensity and weekly deaths of pneumonia and ILI patients. (October 4, 2015 to April 2, 2016).

254x190mm (300 x 300 DPI)

1  
2  
3  
4  
5  
6  
7  
8  
9  
10  
11  
12  
13  
14  
15  
16  
17  
18  
19  
20  
21  
22  
23  
24  
25  
26  
27  
28  
29  
30  
31  
32  
33  
34  
35  
36  
37  
38  
39  
40  
41  
42  
43  
44  
45  
46  
47  
48  
49  
50  
51  
52  
53  
54  
55  
56  
57  
58  
59  
60

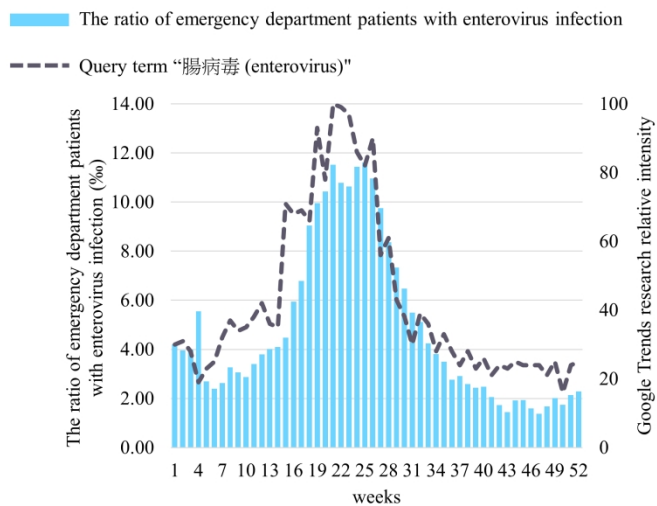

Temporal comparison of Google Trends search relative intensity and the ratio of emergency department patients with enterovirus infection in Taiwan (January 1, 2012 to December 29, 2012).

254x190mm (300 x 300 DPI)



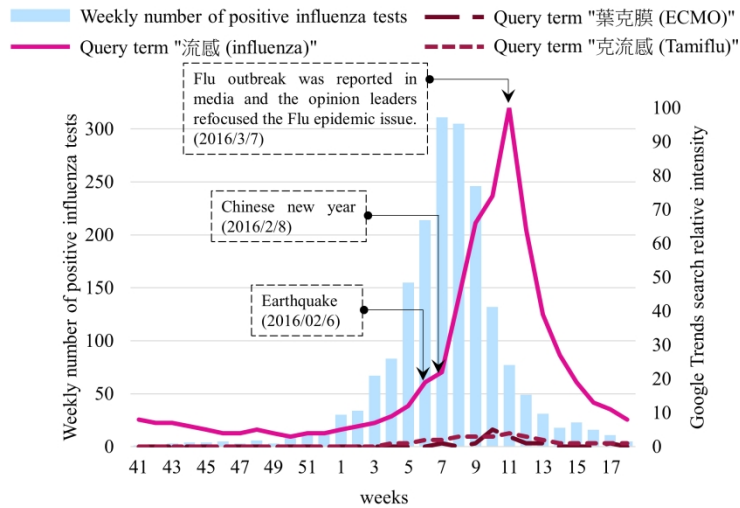

Temporal comparison of Google Trends search relative intensity and weekly number of positive influenza tests. (October 4, 2015 to April 2, 2016).

254x190mm (300 x 300 DPI)

## SUPPLEMENTARY MATERIALS

Supplementary Table 1: List of the Chinese query terms used in the study and their English equivalents.

|                               | English equivalent | Traditional Chinese query terms |
|-------------------------------|--------------------|---------------------------------|
| <b>Disease terms</b>          |                    |                                 |
|                               | common cold        | 感冒                              |
|                               | influenza          | 流感                              |
|                               | enterovirus        | 腸病毒                             |
| <b>Symptom terms</b>          |                    |                                 |
|                               | fever              | 發燒                              |
|                               | cough              | 咳嗽                              |
|                               | running nose       | 流鼻水                             |
|                               | sore throat        | 喉嚨痛                             |
|                               | blister            | 水泡                              |
| <b>Medical equipment term</b> |                    |                                 |
|                               | ECMO               | 葉克膜                             |
| <b>Drug term</b>              |                    |                                 |
|                               | Tamiflu            | 克流感                             |

STROBE Statement—Checklist of items that should be included in reports of *cross-sectional studies*

|                              | Item No | Recommendation                                                                                                                                                                                               | Page No |
|------------------------------|---------|--------------------------------------------------------------------------------------------------------------------------------------------------------------------------------------------------------------|---------|
| <b>Title and abstract</b>    | 1       | (a) Indicate the study's design with a commonly used term in the title or the abstract                                                                                                                       | 1-2     |
|                              |         | (b) Provide in the abstract an informative and balanced summary of what was done and what was found                                                                                                          | 2       |
| <b>Introduction</b>          |         |                                                                                                                                                                                                              |         |
| Background/rationale         | 2       | Explain the scientific background and rationale for the investigation being reported                                                                                                                         | 3-4     |
| Objectives                   | 3       | State specific objectives, including any prespecified hypotheses                                                                                                                                             | 3-4     |
| <b>Methods</b>               |         |                                                                                                                                                                                                              |         |
| Study design                 | 4       | Present key elements of study design early in the paper                                                                                                                                                      | 4-5     |
| Setting                      | 5       | Describe the setting, locations, and relevant dates, including periods of recruitment, exposure, follow-up, and data collection                                                                              | 4-5     |
| Participants                 | 6       | (a) Give the eligibility criteria, and the sources and methods of selection of participants                                                                                                                  | 4-5     |
| Variables                    | 7       | Clearly define all outcomes, exposures, predictors, potential confounders, and effect modifiers. Give diagnostic criteria, if applicable                                                                     | 4-5     |
| Data sources/<br>measurement | 8*      | For each variable of interest, give sources of data and details of methods of assessment (measurement). Describe comparability of assessment methods if there is more than one group                         | 4-5     |
| Bias                         | 9       | Describe any efforts to address potential sources of bias                                                                                                                                                    | NA      |
| Study size                   | 10      | Explain how the study size was arrived at                                                                                                                                                                    | 4-5     |
| Quantitative variables       | 11      | Explain how quantitative variables were handled in the analyses. If applicable, describe which groupings were chosen and why                                                                                 | 4-5     |
| Statistical methods          | 12      | (a) Describe all statistical methods, including those used to control for confounding                                                                                                                        | 5       |
|                              |         | (b) Describe any methods used to examine subgroups and interactions                                                                                                                                          | 5       |
|                              |         | (c) Explain how missing data were addressed                                                                                                                                                                  | NA      |
|                              |         | (d) If applicable, describe analytical methods taking account of sampling strategy                                                                                                                           | NA      |
|                              |         | (e) Describe any sensitivity analyses                                                                                                                                                                        | NA      |
| <b>Results</b>               |         |                                                                                                                                                                                                              |         |
| Participants                 | 13*     | (a) Report numbers of individuals at each stage of study—eg numbers potentially eligible, examined for eligibility, confirmed eligible, included in the study, completing follow-up, and analysed            | NA      |
|                              |         | (b) Give reasons for non-participation at each stage                                                                                                                                                         | NA      |
|                              |         | (c) Consider use of a flow diagram                                                                                                                                                                           | NA      |
| Descriptive data             | 14*     | (a) Give characteristics of study participants (eg demographic, clinical, social) and information on exposures and potential confounders                                                                     | NA      |
|                              |         | (b) Indicate number of participants with missing data for each variable of interest                                                                                                                          | NA      |
| Outcome data                 | 15*     | Report numbers of outcome events or summary measures                                                                                                                                                         | 5-7     |
| Main results                 | 16      | (a) Give unadjusted estimates and, if applicable, confounder-adjusted estimates and their precision (eg, 95% confidence interval). Make clear which confounders were adjusted for and why they were included | 5-7     |

|                          |    |                                                                                                                                                                            |       |
|--------------------------|----|----------------------------------------------------------------------------------------------------------------------------------------------------------------------------|-------|
|                          |    | (b) Report category boundaries when continuous variables were categorized                                                                                                  | NA    |
|                          |    | (c) If relevant, consider translating estimates of relative risk into absolute risk for a meaningful time period                                                           | NA    |
| Other analyses           | 17 | Report other analyses done—eg analyses of subgroups and interactions, and sensitivity analyses                                                                             | NA    |
| <b>Discussion</b>        |    |                                                                                                                                                                            |       |
| Key results              | 18 | Summarise key results with reference to study objectives                                                                                                                   | 11    |
| Limitations              | 19 | Discuss limitations of the study, taking into account sources of potential bias or imprecision. Discuss both direction and magnitude of any potential bias                 | 12    |
| Interpretation           | 20 | Give a cautious overall interpretation of results considering objectives, limitations, multiplicity of analyses, results from similar studies, and other relevant evidence | 11-12 |
| Generalisability         | 21 | Discuss the generalisability (external validity) of the study results                                                                                                      | 11-12 |
| <b>Other information</b> |    |                                                                                                                                                                            |       |
| Funding                  | 22 | Give the source of funding and the role of the funders for the present study and, if applicable, for the original study on which the present article is based              | NA    |

\*Give information separately for exposed and unexposed groups.

**Note:** An Explanation and Elaboration article discusses each checklist item and gives methodological background and published examples of transparent reporting. The STROBE checklist is best used in conjunction with this article (freely available on the Web sites of PLoS Medicine at <http://www.plosmedicine.org/>, Annals of Internal Medicine at <http://www.annals.org/>, and Epidemiology at <http://www.epidem.com/>). Information on the STROBE Initiative is available at [www.strobe-statement.org](http://www.strobe-statement.org).
