# Supplementary material for: Google Trends-based non-English language query data and epidemic diseases: a cross-sectional study of the popular search behaviour in Taiwan
Source: PubMed Central journal article supplement — BMJ Open. 2020 Jul 5;10(7):e034156. doi: 10.1136/bmjopen-2019-034156 (PMC7337886; doi:10.1136/bmjopen-2019-034156), 2020-07-05
Supplement: bmjopen-2019-034156supp001.pdf [file bmjopen-2019-034156supp001.pdf]

**SUPPLEMENTARY MATERIALS**

Supplementary Table 1: List of the Chinese query terms used in the study and their English equivalents.

|                               | English equivalent | Traditional Chinese query terms |
|-------------------------------|--------------------|---------------------------------|
| <b>Disease terms</b>          |                    |                                 |
|                               | common cold        | 感冒                              |
|                               | influenza          | 流感                              |
|                               | enterovirus        | 腸病毒                             |
| <b>Symptom terms</b>          |                    |                                 |
|                               | fever              | 發燒                              |
|                               | cough              | 咳嗽                              |
|                               | running nose       | 流鼻水                             |
|                               | sore throat        | 喉嚨痛                             |
|                               | blister            | 水泡                              |
| <b>Medical equipment term</b> |                    |                                 |
|                               | ECMO               | 葉克膜                             |
| <b>Drug term</b>              |                    |                                 |
|                               | Tamiflu            | 克流感                             |
